# Supplementary material for: Spatially exploring the intersection of socioeconomic status and Canadian cancer-related medical crowdfunding campaigns
Source: PubMed Central journal article supplement — BMJ Open. 2019 Jun 20;9(6):e026365. doi: 10.1136/bmjopen-2018-026365 (PMC6596974; doi:10.1136/bmjopen-2018-026365), 2019-06-20
Supplement: bmjopen-2018-026365.draft_revisions.pdf [file bmjopen-2018-026365.draft_revisions.pdf]

# BMJ Open

BMJ Open is committed to open peer review. As part of this commitment we make the peer review history of every article we publish publicly available.

When an article is published we post the peer reviewers' comments and the authors' responses online. We also post the versions of the paper that were used during peer review. These are the versions that the peer review comments apply to.

The versions of the paper that follow are the versions that were submitted during the peer review process. They are not the versions of record or the final published versions. They should not be cited or distributed as the published version of this manuscript.

BMJ Open is an open access journal and the full, final, typeset and author-corrected version of record of the manuscript is available on our site with no access controls, subscription charges or pay-per-view fees (<http://bmjopen.bmj.com>).

If you have any questions on BMJ Open's open peer review process please email [info.bmjopen@bmj.com](mailto:info.bmjopen@bmj.com)

# BMJ Open

## Spatially Exploring the Intersection of Socio-Economic Status and Canadian Cancer-Related Medical Crowdfunding Campaigns

|                               |                                                                                                                                                                                                                                                                                                                                                    |
|-------------------------------|----------------------------------------------------------------------------------------------------------------------------------------------------------------------------------------------------------------------------------------------------------------------------------------------------------------------------------------------------|
| Journal:                      | <i>BMJ Open</i>                                                                                                                                                                                                                                                                                                                                    |
| Manuscript ID                 | bmjopen-2018-026365                                                                                                                                                                                                                                                                                                                                |
| Article Type:                 | Research                                                                                                                                                                                                                                                                                                                                           |
| Date Submitted by the Author: | 11-Sep-2018                                                                                                                                                                                                                                                                                                                                        |
| Complete List of Authors:     | van Duynhoven , Alysha; Simon Fraser University<br>Lee, Anthony; Simon Fraser University<br>Michel , Ross; Simon Fraser University<br>Snyder, Jeremy; Simon Fraser University, Health Sciences<br>Crooks, Valorie; Simon Fraser University,<br>Chow-White, Peter; Simon Fraser University<br>Schuurman, Nadine; Simon Fraser University, Geography |
| Keywords:                     | Crowdfunding, Equity, Spatial Analysis                                                                                                                                                                                                                                                                                                             |
|                               |                                                                                                                                                                                                                                                                                                                                                    |

SCHOLARONE™  
Manuscripts

1  
2  
3 1 **Spatially Exploring the Intersection of Socio-Economic Status and Canadian Cancer-Related**  
4  
5 2 **Medical Crowdfunding Campaigns**  
6  
7  
8 3  
9

10 4 Alysha van Duynhoven (Department of Geography, Simon Fraser University, Burnaby BC Canada)

11 5 Anthony Lee (Department of Geography, Simon Fraser University, Burnaby BC Canada)

12 6 Ross Michel (Department of Geography, Simon Fraser University, Burnaby BC Canada)

13 7 Jeremy Snyder (Faculty of Health Sciences, Simon Fraser University)

14 8 8888 University Drive; Blusson Hall 10516; Burnaby BC V5A 1S6 Canada; [jcs12@sfu.ca](mailto:jcs12@sfu.ca); 778-782-3258

15 9 Valorie A. Crooks (Department of Geography, Simon Fraser University, Burnaby BC Canada)

16 10 Peter Chow-White (School of Communication, Simon Fraser University, Burnaby BC Canada)

17 11 Nadine Schuurman (Department of Geography, Simon Fraser University, Burnaby BC Canada)

18 12  
19 13 Keywords: Crowdfunding; Equity; Cancer; Spatial Analysis

20 14 Word Count: 2947  
21  
22  
23  
24  
25  
26  
27  
28  
29  
30  
31  
32  
33  
34  
35  
36  
37  
38  
39  
40  
41  
42  
43  
44  
45  
46  
47  
48  
49  
50  
51  
52  
53  
54  
55  
56  
57  
58  
59  
60

## 29 Abstract

30 **Objectives:** Medical crowdfunding is a rapidly growing practice where individuals leverage social  
31 networks to raise money for health-related needs. This practice has allowed many to access health care  
32 and avoid medical debt but has also raised a number of ethical concerns. A dominant criticism of this  
33 practice is that it is likely to increase inequities in access to healthcare if persons from relatively wealthy  
34 backgrounds, media connections, tech savvy, and educational attainments are best positioned to use and  
35 succeed with crowdfunding. To date this concern has been largely speculative and not supported by data.  
36 Our objective in this paper is to assess this concern using socio-economic data and information from  
37 crowdfunding campaigns.

38 **Setting:** To assess this concern, we present an exploratory spatial analysis of a new dataset of  
39 crowdfunding campaigns for cancer-related care by Canadian residents.

40 **Participants:** Four datasets were used: 1) a medical crowdfunding dataset that included cancer-related  
41 campaigns posted by Canadians; 2) 2016 Census Profile for aggregate dissemination areas; 3) aggregate  
42 dissemination area boundaries; and 4) forward sortation area boundaries.

43 **Results:** Our exploratory spatial analysis demonstrates that use of crowdfunding for cancer-related needs  
44 in Canada corresponds with high income, home ownership, and high educational attainment. Campaigns  
45 were also commonly located near city centres.

46 **Conclusions:** These findings support speculative concerns that those in positions of relative socio-  
47 economic privilege disproportionately utilize crowdfunding to address health-related needs. This study  
48 was not able to determine whether other socio-economic dimensions such as race, gender, ethnicity,  
49 nationality, and linguistic fluency are also correlated with use of medical crowdfunding. Thus, we call for  
50 further research to explore the relationship between socio-economic variables and medical crowdfunding  
51 campaigning to explore these other socio-economic variables and campaigns for needs unrelated to  
52 cancer.

## 54 Strengths and Limitations of this Study

55 Developed large dataset of crowdfunding data

56 Presents methods for analyzing datasets of crowdfunding campaign information

57 Links data on crowdfunding campaigns to data on income, home ownership, and education levels

58 Unable to determine whether race, gender, ethnicity, nationality, or linguistic fluency impact use of  
59 crowdfunding

60

61

62

63

64

## 65 Introduction

66 Individuals and groups have increasingly turned to online social networking and social media platforms to  
67 fundraise. This practice has come to be popularly known as crowdfunding. In particular, charitable  
68 crowdfunding has developed as a means for individuals or small groups to finance their personal needs.  
69 Entrepreneurs created online crowdfunding platforms to mediate interactions between campaigners and  
70 donors. These platforms host campaigns, including text, images, and video, facilitate outreach to potential  
71 donors via social media, and process donations.

72 The crowdfunding platform GoFundMe dominates the charitable crowdfunding sector. Before it  
73 recently acquired YouCaring, the second largest social crowdfunding platform, it controlled 90% of the  
74 charitable crowdfunding business in the United States (US) and 80% globally [1,2]. Launched in 2010,  
75 US\$ 5 billion has been raised via GoFundMe to date and this platform supports a community consisting  
76 of more than 50 million donors and users [1]. Campaigns for health-related purposes comprise the largest  
77 proportion of fundraisers hosted by GoFundMe [2,3]. These medical crowdfunding campaigns are  
78 thought to be used to pay for essential services for those lacking comprehensive medical insurance,  
79 elective procedures not covered by insurance, and unproven or experimental medical treatments. They are  
80 also used to pay for indirect needs related to receiving medical care, including travel to receive care,  
81 compensation for time off from work, and payments for medical equipment [3]. The use of crowdfunding  
82 platforms for medical purposes is expected to continue to grow and thus have a substantial impact on how  
83 individuals access health-related care [3,4].

84 Successful medical crowdfunders can benefit greatly from being better able to obtain health-  
85 related support via crowdfunding. However, this practice has also been the target of considerable  
86 criticism. These concerns include worries about fraudulent campaigns, loss of medical privacy, and  
87 encouraging the privatization of healthcare [3,4]. Arguably the most common and serious critique of  
88 medical crowdfunding is that it will exacerbate existing inequities in who is ultimately able to  
89 (financially) access health care. While differential access to health care is shaped by each community's

1  
2  
3 90 health and social care system, insurance coverage, and demographics, in general those in positions of  
4  
5 91 socio-economic privilege, even in universal health systems, have relatively better access to health-related  
6  
7 92 care than their less privileged compatriots. Medical crowdfunding could exacerbate this problem, it is  
8  
9 93 argued, if crowdfunding serves to reward recipients according to their popularity, extent of social  
10  
11 94 networks, technological capabilities, or media savvy rather than need [5]. For example, Young and  
12  
13 95 Scheinberg [4 p. 1623] flag the “potential for unfairly advantaging those with the means to engage with  
14  
15 96 online tools and tap into large social networks, which may lead to an underrepresentation of cases with  
16  
17 97 the greatest need in which patients lack the tools to coordinate effective crowdfunding campaigns.”  
18  
19 98 Similarly, critics express that medical crowdfunding is likely to reinforce existing inequalities in class and  
20  
21 99 power [6] and reward those with social connections to wealthy persons, media connections, and the  
22  
23  
24 100 educational attainments needed to communicate effectively online [7].  
25

26 101       Importantly, criticism that medical crowdfunding mostly benefits those who are socio-  
27  
28 102 economically advantaged is largely speculative and not empirically supported. Quantitative studies of  
29  
30 103 medical crowdfunding are scarce due to the challenges of compiling, organizing, and analyzing data and  
31  
32 104 those studies that have been conducted using crowdfunding datasets have not addressed the issue of  
33  
34 105 equitable access to care. Here we present an exploratory analysis of a new dataset of crowdfunding  
35  
36 106 campaigns for cancer-related care by Canadian residents that is connected to a selection of demographic  
37  
38 107 information from the 2016 Canadian Census to explore the relationship between campaign use and socio-  
39  
40 108 economic status. We captured this medical crowdfunding dataset using an automated data crawling  
41  
42 109 program and machine learning techniques. We specifically examine crowdfunding campaigns for cancer-  
43  
44 110 related care as existing research has already documented the commonality of such campaigns in Canada  
45  
46 111 [8,9,10], and we contrast these campaigns against geo-demographic trends using an exploratory spatial  
47  
48 112 data analysis (ESDA) approach. ESDA facilitates the investigation of prior assumptions and guides the  
49  
50 113 identification of spatial patterns [11,12]. We use these patterns to raise important new research questions  
51  
52 114 about medical crowdfunding in the discussion.  
53  
54  
55  
56  
57  
58  
59  
60

## 115 **Materials and Methods**

116 We utilized four datasets in this exploratory analysis: 1) a medical crowdfunding dataset that included  
117 cancer-related campaigns posted by Canadians; 2) 2016 Census Profile for aggregate dissemination areas;  
118 3) aggregate dissemination area boundaries; and 4) forward sortation area boundaries.

119 We compiled a medical crowdfunding dataset by creating an automated web crawling algorithm.

120 To do this we developed a Python based automated web crawler that scraped a major crowdfunding  
121 platform looking for key words or strings of words – in this case, the keyword ‘cancer.’ The search  
122 took place on June 11, 2016 and was classified – meaning that borderline terms were flagged for the user  
123 who would then read the site and determine if it should be included. After relevant campaigns were  
124 identified, we used a SQL database server to store the site in HTML form for further analysis. Once the  
125 full HTML files from each campaign were retrieved, the pages were then parsed to remove HTML tags.  
126 Further cleaning and labeling took place using a machine learning algorithm designed to find and include  
127 any missing information or attributes of the campaigns related to cancer. The final records were stored in  
128 a Redis database for access by simple query for analysis. The dataset used in this study contains 1788  
129 records from May 2012 to June 2016 pertaining to cancer-related campaigns created by Canadians.

130 Aggregate dissemination areas (ADAs) are a new census product released by Statistics Canada as  
131 part of the 2016 Canadian Census. Delineation of ADAs considers boundaries of previous census  
132 products, including existing census divisions, census metropolitan areas, and census tracts [13]. Forward  
133 sortation areas (FSAs) are administrative boundaries determined by Canada Post [14]. They are  
134 alphanumerically represented by “the first three characters in a Canadian postal code” [14]. The records  
135 contained in our crowdfunding dataset described above have an FSA attribute. This geographic data unit  
136 enables ESDA. Boundaries of ADAs and FSAs were obtained from Statistics Canada [15].

137 Socio-economic status and its correlation with an individual's health or ability to obtain  
138 treatments have been previously assessed at a FSA level [16,17,18], which is why we opted to explore  
139 socio-economic status indicators. Variables related to income, education, and housing were chosen and

1  
2  
3 140 obtained using the University of Toronto's Canadian Census Analyser at the ADA level (see Table 1 for  
4  
5 141 exact variables obtained) [19]. Further data pre-processing and transformations were required in order to  
6  
7 142 link socio-economic data to FSAs due to current data limitations.  
8

9 143

10  
11 144 \*\* insert Table 1 here \*\*  
1213  
14 145

15  
16 146 Profile and boundary datasets for FSAs are unavailable for the Statistics Canada 2016 Census  
17  
18 147 data. In lieu of the FSAs, we computed the weighted average of socio-economic variables based on the  
19  
20 148 percent of spatial overlap between ADAs and FSAs. To prepare for this conversion, ADAs were spatially  
21  
22 149 joined with data retrieved from the 2016 Census Profile. Each FSA is also joined with respective  
23  
24 150 campaign frequencies (see Figure 1 for the high-level description of conversion procedure utilized to add  
25  
26 151 socio-economic data at ADA-level to FSA-level). Once the relationship matrix was generated from the  
27  
28 152 function `GenerateWeights`, it was then retrieved and used to calculate weighted averages of socio-  
29  
30 153 economic variables contained in each intersecting ADA. These weighted socio-economic variables were  
31  
32 154 appended to each respective FSA.  
33

34  
35 155 \*\* insert Figure 1 here \*\*  
3637  
38 156

39  
40 157 Using ArcMap from the ArcGIS suite (version 10.5), quintiles were created using natural breaks.  
41  
42 158 The data were categorized as quintiles as we trusted that five classes would be sufficient to showcase  
43  
44 159 meaningful differences while minimizing complexity of visual results. These quintiles were used in  
45  
46 160 cartographic representations to support ESDA tasks. Visual comparisons at regional and provincial levels  
47  
48 161 were then conducted with regards to income, education, and housing ownership. The creation of these  
49  
50 162 quintiles allowed project correspondents to examine the data for geographic trends. These cartographic  
51  
52 163 products enabled the significance of these socio-economic variables to be gauged for medical  
53  
54 164 crowdfunding.  
55  
56  
57  
58  
59  
60



1  
2  
3 165 Campaigns for each FSA were counted, and these frequencies were assigned to their respective  
4  
5 166 boundaries. These FSAs were subsequently linked with ADAs that feature census variables from the 2016  
6  
7 167 Canadian Census. These variables consisted of income, number of persons who have completed post-  
8  
9 168 secondary education, and home ownership. These linkages were informed by research conducted by  
10  
11 169 Rogers [20] in which these variables were shown to be commonly associated with vulnerability with  
12  
13 170 regard to health and healthcare. To link these datasets, the variables were weighted based on the percent  
14  
15 171 of areal overlap each ADA shares with each FSA. The resulting weighted attributes were then divided  
16  
17 172 into quintiles using a method similar to Sothorn et al. [21]. Resulting quintiles were then visualized in an  
18  
19 173 interactive cartographic display, or web map, enabling geographic comparisons to be made. This map can  
20  
21 174 be viewed at: <https://www.crowdfundingforhealth.org/chrpexplorer>. Figure 2 describes the process for  
22  
23 175 users of CHRP to explore the ESDA results. Figure 3 shows an image of the web map interface.

24  
25  
26 176 \*\* insert Figure 2 here \*\*

27  
28 177  
29  
30 178 \*\* insert Figure 3 here \*\*

### 31 32 179 33 34 180 *Patient and Public Involvement*

35  
36 181 As the information analyzed in this study was publicly available, patients were not recruited for or  
37  
38 182 actively involved in this study.

### 39 40 183 41 42 184 **Results**

43  
44 185 Our exploratory analysis utilizes socio-economic variables that have been linked with FSAs. These  
45  
46 186 include a layer of campaign counts per FSA, income, education, and housing (see Figures 4, 5, 6, & 7 for  
47  
48 187 screen captures).

49  
50  
51 188 \*\* insert Figure 4 here \*\*

52  
53 189 \*\* insert Figure 5 here \*\*

54  
55 190 \*\* insert Figure 6 here \*\*

1  
2  
3 191 \*\* insert Figure 7 here \*\*  
4

5 192  
6  
7 193 In addition to the web map, a table was generated that showed the proportion of crowdfunding campaigns  
8  
9 194 that belong in each quintile for each socio-economic variable (see Tables 2, 3, 4, & 5).  
10  
11

12 195  
13  
14 196 \*\* insert Table 2 here \*\*

15  
16 197 \*\* insert Table 3 here \*\*

17  
18 198 \*\* insert Table 4 here \*\*

19  
20 199 \*\* insert Table 5 here \*\*  
21

22 200  
23  
24 201 It is important to note that only 176 FSAs out of the 1620 FSAs in Canada contained at least one  
25  
26 202 crowdfunding campaign, with the population of these FSAs representing approximately 5% of the  
27  
28 203 national total. A separate table shows the distribution of the crowdfunding campaigns between each  
29  
30 204 Canadian province and territory and the average value of each socio-economic variable within each  
31  
32 205 administrative division (see Table 6).  
33  
34

35 206  
36  
37 207 \*\* insert Table 6 here \*\*  
38

39 208  
40  
41 209 The average income of crowdfunding campaigners in this dataset is within middle to high level  
42  
43 210 FSAs, with 65.49% of campaigns being located in FSAs within the three highest quintiles in the income  
44  
45 211 category (see Table 3). These higher income levels are matched by higher rates of home ownership  
46  
47 212 among these campaigners, with housing ownership values being larger in the middle quintile (see Table  
48  
49 213 5). This group also tends to be well educated, with education values tending toward the higher quintiles  
50  
51 214 (see Table 4).  
52

53  
54 215 Collectively, our ESDA shows that use of cancer-related medical crowdfunding is occurring  
55  
56 216 unevenly across the country relative to population distribution. For example, Canadians' cancer-related  
57

1  
2  
3 217 crowdfunding campaigns were also commonly located in close proximity to city centres (see Figure 3).  
4  
5 218 Provincial differences in campaign use also exist. Campaigns were more commonly posted in the  
6  
7 219 provinces of Ontario and British Columbia and less so in the Atlantic provinces. There is a noticeable  
8  
9 220 density of campaigns in the prairie provinces of Alberta and Saskatchewan.  
10

11 221

## 12 222 **Discussion**

13  
14  
15 223 Our ESDA-based findings support existing concerns that persons in positions of relative socio-economic  
16  
17 224 privilege disproportionately utilize crowdfunding to address health-related needs – in this case care  
18  
19 225 related to cancer. Individuals in the highest income FSAs were found to be the heaviest users of medical  
20  
21 226 crowdfunding for cancer-related campaigns, as were individuals in FSAs with high rates of home  
22  
23 227 ownership. These ESDA-based interpretations support the idea that wealthier individuals are more likely  
24  
25 228 to see crowdfunding as a way to draw together financial resources from elsewhere to meet their health  
26  
27 229 needs. We also observed that individuals in FSAs with higher rates of education turned more frequently to  
28  
29 230 medical crowdfunding. This ESDA-based interpretation supports existing claims that individuals who are  
30  
31 231 better educated, more familiar with online technologies, and better able to express themselves online are  
32  
33 232 more likely to take advantage of crowdfunding to address health-related needs. The positive correlation  
34  
35 233 between the amount raised in a campaign and number of times the campaign was shared supports the  
36  
37 234 speculation that social capital and tech-savviness are important constituents of crowdfunding campaign  
38  
39 235 success.  
40  
41  
42

43 236 Our exploration of geo-demographic trends regarding Canadians' use of cancer-related  
44  
45 237 crowdfunding shows that this is a highly urban phenomenon. This is somewhat counterintuitive  
46  
47 238 considering the extensive health service gaps in rural Canadian communities that drive some residents to  
48  
49 239 consider alternative ways to access necessary care [22], such as crowdfunding for the costs of private  
50  
51 240 treatment or to relocate to an urban centre. Research regarding a potential urban-rural divide in  
52  
53 241 crowdfunding use is very limited and so it is difficult to know why there can be proportionately less use  
54  
55 242 in rural areas. This may be due to limited access to technology or lower levels of education in rural  
56  
57  
58  
59  
60

1  
2  
3 243 Canadian communities [23,24]. Alternatively, it may be due to the strong voluntary and informal care  
4  
5 244 sectors that ‘tight-knit’ rural communities are so well known for that would lead to residents pulling  
6  
7 245 together to support those in need [22,25], which would lessen the need for drawing on disparate social  
8  
9 246 networks via crowdfunding. It is important to note, however, that our ESDA approach means that we  
10  
11 247 cannot conclusively state that our analysis documents a clear urban-rural divide. This is due in part to the  
12  
13 248 large aggregations of FSAs as well as the sparse population of Nunavut that can both over- and under-  
14  
15 249 estimate socio-economic variables. We thus flag this as an important issue for future medical  
16  
17 250 crowdfunding research.

18  
19  
20 251 While our interpretations of the ESDA results support the general concern that medical  
21  
22 252 crowdfunding will tend to exacerbate socio-economic inequities in access to health-related care, only  
23  
24 253 certain dimensions of this critique were explored here. For example, while we found positive correlations  
25  
26 254 between cancer-related crowdfunding and wealth and education levels, we were not able to explore  
27  
28 255 whether other dimensions of socio-economic privilege are positively correlated. These dimensions  
29  
30 256 include race, gender, ethnicity, nationality, and linguistic fluency, all of which are factors that lead to  
31  
32 257 inequities in health status [26,27]. This leads us to make three important points. First, we acknowledge  
33  
34 258 that it is possible that only certain dimensions of socio-economic privilege correlate with using  
35  
36 259 crowdfunding to address health-related needs, and that some or all of those not explored here do not shape  
37  
38 260 medical crowdfunding use in the ways documented here. Second, and because of this, it is important to  
39  
40 261 explicitly state that this exploratory analysis supports the hypothesis of a more general correlation but  
41  
42 262 does not provide direct evidence supporting every dimension of this correlation. And third, we call for  
43  
44 263 further research to explore the relationship between socio-economic variables and medical crowdfunding  
45  
46 264 use in general or for cancer-related campaigns in order to assist with developing a more robust  
47  
48 265 understanding of any interrelationships.

### 51 266 *Limitations*

52  
53  
54 267 Only the first three digits of postal codes were included in the dataset of crowdfunding campaigns, which  
55  
56 268 were then linked to FSAs. FSAs are smaller in urban areas and may be geographically vast in rural areas.

1  
2  
3 269 Linking ADAs to FSAs could result in broad generalizations and aggregation errors and lead to ecological  
4  
5 270 fallacies. This implies that findings from our study are limited, as only broad claims can be stated. The  
6  
7 271 aforementioned generalizations could be less impacted in urban areas with smaller FSAs comparatively to  
8  
9 272 rural areas. While this has implications for our results, the impact may be reduced considering that as of  
10  
11 273 2011, over 80% of Canada's population lives in urban environments [28].

12  
13  
14 274 We acknowledge that a medical crowdfunding campaign recipient may be different from  
15  
16 275 campaign's creator. This necessitates further research with regard to the issues explored in this analysis  
17  
18 276 because campaigners may reside in or report different FSAs than the individual or family in need of  
19  
20 277 financial assistance. Further to this, postal codes are self-reported by campaign creators, which allows  
21  
22 278 typos and misstate to be made. Nothing can be done to address this as a limitation beyond acknowledging  
23  
24 279 our awareness of the potential for errors to exist in postal code reporting.

25  
26  
27 280 FSAs encoded in the campaign entries dictated the primary level of aggregation for our study,  
28  
29 281 thus necessitating us to limit selection of socio-economic variables. If spatial and non-spatial attributes  
30  
31 282 were improved, more socio-economic status variables could be involved, such as sex or immigration  
32  
33 283 status. This would aid in obtaining more robust results. Another limitation encountered was the fact that  
34  
35 284 the census profiles at the FSA-level were unavailable due to accuracy issues (Statistics Canada, 2018)  
36  
37 285 [29]. To substitute, a methodology to link and weight the chosen socio-economic variables from the  
38  
39 286 ADA-level to FSA-level had to be developed.

40  
41  
42 287 As our dataset was acquired for a snapshot in time, we acknowledge that campaigns have been  
43  
44 288 instantiated at different times and have been underway for varying durations. These comparisons may  
45  
46 289 impact results because the campaign duration captured in the current dataset may not be representative of  
47  
48 290 the overall success of the campaign. Future work may look to compare individual campaigns that have  
49  
50 291 either been run for the same length of time or have completed their respective lifecycles on major  
51  
52 292 crowdfunding platforms.

53  
54  
55  
56 293

## 294 **Conclusions**

295 The findings reported here provide the first data-informed support for more speculative concerns that  
296 charitable crowdfunding will tend to advantage relatively socio-economically privileged individuals.  
297 While supporters of medical crowdfunding point to its potential to help people access necessary health  
298 care and avoid debt or even medical bankruptcy, this paper demonstrates that this potential is not  
299 distributed equitably across society. While these findings do not eliminate the advantages of medical  
300 crowdfunding, they show its limits in serving as a systematic and fair solution to structural deficiencies in  
301 health systems. Additional research, including using the methods described here, would help to  
302 demonstrate whether these findings are reproduced for other socio-economic factors, in countries other  
303 than Canada, and for health needs beyond cancer.

304

## 305 **Contributorship Statement**

306 AvD, AL, and RM contributed to developing the methods, conducting the analysis, and writing  
307 the manuscript. JS and VAC contributed to method design, securing project funding, and writing  
308 the manuscript. PCW contributed to data acquisition and writing the manuscript. NS contributed  
309 to method design and writing the manuscript.

310

## 311 **Competing Interests**

312 We declare no competing interests.

313

## 314 **Funding**

1  
2  
3 315 This study was funded by the Canadian Institutes of Health Research. VAC holds the Canada Research  
4  
5 316 Chair in Health Services Geographies and a Scholar Award from the Michael Smith Foundation for  
6  
7 317 Health Research.  
8  
9

10 318

## 13 319 **Data Sharing Statement**

16 320 All crowdfunding data is available from the authors on request.  
17  
18  
19

## 20 321 **References**

- 23 322 1. GoFundMe. About Us. [cited 17 July 2018]. Available from: [https://www.gofundme.com/about-](https://www.gofundme.com/about-us)  
24 323 [us](https://www.gofundme.com/about-us).
- 25 324 2. Harris A. GoFundMe keeps gobbling up competitors, says it's "very good for the market". Fast  
26 325 Company. 4 April 2018. Available from: [https://www.fastcompany.com/40554199/gofundme-](https://www.fastcompany.com/40554199/gofundme-keeps-gobbling-up-competitors-says-its-very-good-for-the-market)  
27 326 [keeps-gobbling-up-competitors-says-its-very-good-for-the-market](https://www.fastcompany.com/40554199/gofundme-keeps-gobbling-up-competitors-says-its-very-good-for-the-market).
- 29 327 3. Snyder J, Mathers A, Crooks VA. Fund my treatment!: A call for ethics-focused social science  
30 328 research into the use of crowdfunding for medical care. *Social Science & Medicine*. 2016 Nov  
31 329 1;169:27-30.
- 32 330 4. Young MJ, Scheinberg E. The rise of crowdfunding for medical care: promises and perils. *Jama*.  
33 331 2017 Apr 25;317(16):1623-4.
- 34 332 5. Robinson L, Cotten SR, Ono H, Quan-Haase A, Mesch G, Chen W, Schulz J, Hale TM, Stern MJ. Digital  
35 333 inequalities and why they matter. *Information, communication & society*. 2015 May  
36 334 4;18(5):569-82.
- 37 335 6. Paulus TM, Roberts KR. Crowdfunding a "Real-life Superhero": the construction of worthy bodies  
38 336 in medical campaign narratives. *Discourse, Context & Media*. 2018 Mar 1;21:64-72.
- 39 337 7. Snyder J. Crowdfunding for medical care: ethical issues in an emerging health care funding  
40 338 practice. *Hastings Center Report*. 2016 Nov;46(6):36-42.
- 42 339 8. Snyder J, Crooks VA, Mathers A, Chow-White P. Appealing to the crowd: ethical justifications in  
43 340 Canadian medical crowdfunding campaigns. *Journal of medical ethics*. 2017 Jan 30;medethics-  
44 341 2016.
- 45 342 9. The LO. Mind the gap: charity and crowdfunding in health care. *The Lancet. Oncology*. 2017  
46 343 Mar;18(3):269.
- 47 344 10. Snyder J, Chow-White P, Crooks VA, Mathers A. Widening the gap: additional concerns with  
48 345 crowdfunding in health care. *The Lancet Oncology*. 2017 May 1;18(5):e240.
- 49 346 11. Bailey TC, Gatrell AC. *Interactive spatial data analysis*. Essex: Longman Scientific & Technical;  
50 347 1995.
- 51 348 12. Haining R, Wise S, Ma J. *Exploratory spatial data analysis*. *Journal of the Royal Statistical*  
52 349 *Society: Series D (The Statistician)*. 1998 Sep;47(3):457-69.
- 53 350 13. Statistics Canada. The aggregate dissemination area (ADA): a new census dissemination  
54 351 geographic area. [cited 23 February 2018]. Available from: [http://www12.statcan.gc.ca/census-](http://www12.statcan.gc.ca/census-recensement/2016/geo/ADA/adainfo-eng.cfm)  
55 352 [recensement/2016/geo/ADA/adainfo-eng.cfm](http://www12.statcan.gc.ca/census-recensement/2016/geo/ADA/adainfo-eng.cfm)



- 1  
2  
3 353 14. Statistics Canada. Forward Sortation Area – Definition. [cited 23 February 2018]. Available from:  
4 354 <http://www.ic.gc.ca/eic/site/bsf-osb.nsf/eng/br03396.html>  
5 355 15. Statistics Canada. Boundary files. [cited 23 February 2018]. Available from:  
6 356 <http://www12.statcan.gc.ca/census-recensement/2011/geo/bound-limit/bound-limit-eng.cfm>  
7 357 16. Alter DA, Naylor CD, Austin P, Tu JV. Effects of socioeconomic status on access to invasive  
8 358 cardiac procedures and on mortality after acute myocardial infarction. *New England Journal of*  
9 359 *Medicine*. 1999 Oct 28;341(18):1359-67.  
10 360 17. Goovaerts P. Geostatistical analysis of health data with different levels of spatial aggregation.  
11 361 *Spatial and spatio-temporal epidemiology*. 2012 Apr 1;3(1):83-92.  
12 362 18. Kapral MK, Wang H, Mamdani M, Tu JV. Effect of socioeconomic status on treatment and  
13 363 mortality after stroke. *Stroke*. 2002 Jan 1;33(1):268-75.  
14 364 19. Faculty of Arts & Science, University of Toronto. Canadian Census Analyser [cited 23 February  
15 365 2018]. Available from: <http://dc1.chass.utoronto.ca/census/index.html>  
16 366 20. Rogers AC. Vulnerability, health and health care. *Journal of Advanced Nursing*. 1997  
17 367 Jul;26(1):65-72.  
18 368 21. Southern DA, Ghali WA, Faris PD, Norris CM, Galbraith PD, Graham MM, Knudtson ML.  
19 369 Misclassification of income quintiles derived from area-based measures: A comparison of  
20 370 enumeration area and forward sortation area. *Canadian Journal of Public Health/Revue*  
21 371 *Canadienne de Sante'e Publique*. 2002 Nov 1:465-9.  
22 372 22. Kulig JC, Williams AM, editors. *Health in rural Canada*. UBC Press; 2011 Dec 6.  
23 373 23. Haight M, Quan-Haase A, Corbett BA. Revisiting the digital divide in Canada: the impact of  
24 374 demographic factors on access to the internet, level of online activity, and social networking site  
25 375 usage. *Information, Communication & Society*. 2014 Apr 21;17(4):503-19.  
26 376 24. Friesen L, Purc-Stephenson RJ. Should I Stay or Should I Go? Perceived Barriers to Pursuing a  
27 377 University Education for Persons in Rural Areas. *Canadian Journal of Higher Education*.  
28 378 2016;46(1):138-55.  
29 379 25. Caxaj CS, Gill NK. Belonging and Mental Wellbeing Among a Rural Indian-Canadian Diaspora:  
30 380 Navigating Tensions in "Finding a Space of Our Own". *Qualitative health research*. 2017  
31 381 Jul;27(8):1119-32.  
32 382 26. Hankivsky O. Women's health, men's health, and gender and health: Implications of  
33 383 intersectionality. *Social science & medicine*. 2012 Jun 1;74(11):1712-20.  
34 384 27. Williams DR, Sternthal M. Understanding racial-ethnic disparities in health: sociological  
35 385 contributions. *Journal of health and social behavior*. 2010 Mar;51(1\_suppl):S15-27.  
36 386 28. Statistics Canada. Forward sortation areas currently being analyzed, 2016 Census. [cited 25  
37 387 February 2018]. Available from: [http://www12.statcan.gc.ca/census-recensement/2016/ref/FSA-](http://www12.statcan.gc.ca/census-recensement/2016/ref/FSA-note-eng.cfm)  
38 388 [note-eng.cfm](http://www12.statcan.gc.ca/census-recensement/2016/ref/FSA-note-eng.cfm).  
39 389 29. Statistics Canada. Population, urban and rural, by province and territory (Canada). [cited 23  
40 390 February 2018]. Available from: [http://www.statcan.gc.ca/tables-tableaux/sum-](http://www.statcan.gc.ca/tables-tableaux/sum-som/l01/cst01/demo62a-eng.htm)  
41 391 [som/l01/cst01/demo62a-eng.htm](http://www.statcan.gc.ca/tables-tableaux/sum-som/l01/cst01/demo62a-eng.htm)  
42  
43  
44  
45 392  
46  
47 393  
48  
49 394  
50  
51 395  
52  
53 396  
54  
55  
56  
57  
58  
59  
60



397 **Tables**

| Variable                                | Data Obtained                                                                                                                                                                                                                                                  |
|-----------------------------------------|----------------------------------------------------------------------------------------------------------------------------------------------------------------------------------------------------------------------------------------------------------------|
| <b>Population and dwelling counts</b>   | Population, 2016                                                                                                                                                                                                                                               |
| <b>Income</b><br>(Total Sex / Total)    | Income statistics in 2015 for the population aged 15 years and over in private households - 100% data / Number of after-tax income recipients aged 15 years and over in private households - 100% data / Median after-tax income in 2015 among recipients (\$) |
| <b>Education</b><br>(Total Sex / Total) | Highest certificate, diploma or degree for the population aged 15 years and over in private households - 25% sample data / Postsecondary certificate, diploma or degree                                                                                        |
| <b>Housing</b><br>(Total Sex / Total)   | Private households by tenure - 25% sample data / Owner                                                                                                                                                                                                         |

398 **Table 1. Variables Obtained from 2016 Census Profiles for Aggregate Dissemination Areas.**  
 399 Retrieved from the Canadian Census Analyser, University of Toronto

400

| Quintile     | Number of FSA | Percentage (FSA) | Number of Campaigns | Percentage (Campaigns) |
|--------------|---------------|------------------|---------------------|------------------------|
| 1 - 5        | 114           | 64.77%           | 247                 | 13.81%                 |
| 6 - 17       | 36            | 20.45%           | 337                 | 18.85%                 |
| 18 - 41      | 16            | 9.09%            | 402                 | 22.48%                 |
| 42 - 76      | 6             | 3.41%            | 362                 | 20.25%                 |
| 77 - 138     | 4             | 2.27%            | 440                 | 24.61%                 |
| <b>Total</b> | 176           | 100.00%          | 1788                | 100.00%                |

401 **Table 2. Frequency of Campaigns per FSA. Proportion of Campaigns belonging to each Quintile.**

402

| Quintile                | Number of FSA | Percentage (FSA) | Number of Campaigns | Percentage (Campaigns) |
|-------------------------|---------------|------------------|---------------------|------------------------|
| \$0.00 - \$12699.19     | 3             | 1.70%            | 104                 | 5.82%                  |
| \$12699.19 - \$28556.91 | 54            | 30.68%           | 513                 | 28.69%                 |
| \$28556.91 - \$33333.84 | 63            | 35.80%           | 449                 | 25.11%                 |
| \$33333.84 - \$38980.26 | 45            | 25.57%           | 593                 | 33.17%                 |
| \$38980.26 - \$51498.11 | 11            | 6.25%            | 129                 | 7.21%                  |
| <b>Total</b>            | 176           | 100.00%          | 1788                | 100.00%                |

403 **Table 3. Income, Median After-Tax (2015). Proportion of Campaigns belonging to each Quintile.**

404

| Quintile     | Number of FSA | Percentage (FSA) | Number of Campaigns | Percentage (Campaigns) |
|--------------|---------------|------------------|---------------------|------------------------|
| 1 - 1397     | 12            | 6.82%            | 159                 | 8.89%                  |
| 13979 - 2980 | 41            | 23.30%           | 308                 | 17.23%                 |
| 2980 - 4156  | 72            | 40.91%           | 755                 | 42.23%                 |
| 4156 - 6087  | 46            | 26.14%           | 524                 | 29.31%                 |
| 6087 - 10046 | 5             | 2.84%            | 42                  | 2.35%                  |
| <b>Total</b> | 176           | 100.00%          | 1788                | 100.00%                |

405 **Table 4. Education, Post-Secondary. Proportion of Campaigns belonging to each Quintile.**

406

| Quintile     | Number of FSA | Percentage (FSA) | Number of Campaigns | Percentage (Campaigns) |
|--------------|---------------|------------------|---------------------|------------------------|
| 1 - 1393     | 17            | 9.66%            | 180                 | 10.07%                 |
| 1393 - 2429  | 38            | 21.59%           | 283                 | 15.83%                 |
| 2429 - 3218  | 68            | 38.64%           | 711                 | 39.77%                 |
| 3218 - 4579  | 48            | 27.27%           | 571                 | 31.94%                 |
| 4579 - 7121  | 5             | 2.84%            | 43                  | 2.40%                  |
| <b>Total</b> | 176           | 100.00%          | 1788                | 100.00%                |

34 **Table 5. Housing, Owner. Proportion of Campaigns belonging to each Quintile.**

| Province/<br>Territory                 | Number<br>of FSAs | Number of<br>Campaigns | Percentage<br>(FSA) | Percentage<br>(Campaigns) | Population | Income,<br>Median<br>After-Tax<br>(Average) | Education,<br>Post-<br>Secondary<br>(Average) | Housing,<br>Owner<br>(Average) |
|----------------------------------------|-------------------|------------------------|---------------------|---------------------------|------------|---------------------------------------------|-----------------------------------------------|--------------------------------|
| <b>British<br/>Columbia</b>            | 32                | 401                    | 18.18%              | 22.43%                    | 268112     | \$28,716.63                                 | 3728                                          | 2599                           |
| <b>Alberta</b>                         | 21                | 310                    | 11.93%              | 17.34%                    | 203643     | \$36,012.35                                 | 3393                                          | 2846                           |
| <b>Saskatchewan</b>                    | 14                | 85                     | 7.95%               | 4.75%                     | 138065     | \$34,795.72                                 | 3613                                          | 3194                           |
| <b>Manitoba</b>                        | 9                 | 66                     | 5.11%               | 3.69%                     | 83126      | \$31,275.32                                 | 3211                                          | 3032                           |
| <b>Ontario</b>                         | 47                | 576                    | 26.70%              | 32.21%                    | 436637     | \$31,865.32                                 | 3942                                          | 3105                           |
| <b>Quebec</b>                          | 18                | 139                    | 10.23%              | 7.77%                     | 158832     | \$30,057.44                                 | 3923                                          | 2675                           |
| <b>New<br/>Brunswick</b>               | 12                | 55                     | 6.82%               | 3.08%                     | 75339      | \$26,745.83                                 | 2287                                          | 2310                           |
| <b>Nova Scotia</b>                     | 9                 | 69                     | 5.11%               | 3.86%                     | 73961      | \$31,392.79                                 | 3908                                          | 2425                           |
| <b>Prince Edward<br/>Island</b>        | 2                 | 25                     | 1.14%               | 1.40%                     | 15301      | \$27,888.67                                 | 2984                                          | 2582                           |
| <b>Newfoundland<br/>&amp; Labrador</b> | 9                 | 53                     | 5.11%               | 2.96%                     | 69103      | \$26,503.28                                 | 2868                                          | 2809                           |
| <b>Yukon</b>                           | 1                 | 5                      | 0.57%               | 0.28%                     | 16962      | \$41,664.80                                 | 3278                                          | 2599                           |
| <b>Northwest<br/>Territories</b>       | 1                 | 3                      | 0.57%               | 0.17%                     | 823        | \$51,498.11                                 | 415                                           | 228                            |
| <b>Nunavut</b>                         | 1                 | 1                      | 0.57%               | 0.06%                     | 3          | \$63.72                                     | 0                                             | 0                              |
| <b>Total</b>                           | 176               | 1788                   | 100.00%             | 100.00%                   | 1539908    | \$30,652.31                                 | 2889                                          | 2339                           |

407

408 **Table 6. Number of Campaigns, Population, and Socio-economic Values per Province.**

1  
2  
3 409 **Figure Legends**

410 **Figure 1: High-Level Description of Conversion Procedure Utilized to add Socio-Economic Data at**  
411 **ADA-Level to FSA-Level.** This figure denotes the methodology employed to associate socio-economic  
412 data at the ADA-level with the crowdfunding data collected at the FSA-level.

413 **Figure 2: Sample Interaction Sequence to Support Adding Context to Campaign Markers in the**  
414 **Interactive Web Mapping Tool.** This figure provides a set of sample instructions to users of the CHRP  
415 web map to better understand the datasets displayed.

416 **Figure 3: Screen Capture of Web Map Application (Main Page).** This figure shows the home page of  
417 the CHRP. The data shown in this figure denotes the locations of all crowdfunding campaigns involved  
418 with this study. Basic information associated with each of the campaigns can be viewed here.

419 **Figure 4: Screen Capture of Web Map Application (with the Exploratory layer of Frequency**  
420 **Counts of Campaigns per FSA Displayed).** This figure shows the CHRP displaying one of its  
421 exploratory layers. The variable of interest here is number of crowdfunding campaigns per forward  
422 sortation area.

423 **Figure 5: Screen Capture of Web Map Application (with the Exploratory layer of Income (Median,**  
424 **After-Tax, 2015) Displayed).** This figure shows the CHRP displaying one of its exploratory layers. The  
425 variable of interest here is income (median, after-tax, 2015). The income data was obtained from the 2016  
426 Canadian Census at the ADA-level.

427 **Figure 6: Screen Capture of Web Map Application (with Exploratory layer of Education (Number**  
428 **of People with a Post-Secondary Education) Displayed).** This figure shows the CHRP displaying one  
429 of its exploratory layers. The variable of interest here is education (number of individuals that identify as  
430 having post-secondary education). The education data was obtained from the 2016 Canadian Census at  
431 the ADA-level.

432 **Figure 7: Screen Capture of Web Map Application (with the Exploratory layer of Housing**  
433 **(Number of People that own homes) Displayed).** This figure shows the CHRP displaying one of its  
434 exploratory layers. The dataset of interest here is housing (number of individuals that own homes). The  
435 housing data was obtained from the 2016 Canadian Census at the ADA-level.

```
1
2
3
4
5
6
7 Algorithm GenerateWeights(ADA dataset, FSA dataset)
8 begin
9   a = Number of FSA, b = Number of ADA
10  Initialize relationship matrix of size a rows by b columns
11  For each i ∈ {FSA1...FSAa):
12    Select all from ADA that intersect with FSAi
13    For each j ∈ {intersecting ADA retrieved in selection}:
14      Calculate percent area that ADAj occupies in FSAi
15      Add weight to matrix at the position corresponding with the respective FSA
16      and ADA IDs.
17    Store relationship matrix as CSV for reuse
18  end
19
20
21
22
23
24
25
26
27
28
29
30
31
32
33
34
35
36
37
38
39
40
41
42
43
44
45
46
47
48
49
50
51
52
53
54
55
56
57
58
59
60
```

165x74mm (220 x 220 DPI)

The User:

1. Views the "CHRP Explorer" web mapping application
2. Clicks and drags the map to populate the campaign list sidebar
3. Clicks on campaign markers or hovers over sidebar listings to learn more about individual Canadian medical crowdfunding campaigns
4. Uses the basic filters slider to filter campaigns to have at least \$10,000 raised, more than 300 friends, and at least 100 donations
5. Clicks the "Exploratory" tab to change the panel contents
6. Selects "Income" under the "Campaign - Socioeconomic Variable Comparison Layers by Forward sortation area" section
7. Zooms into a geographic area of interest and clicks on a coloured area to view the median income average for that FSA the campaign is associated with

164x63mm (220 x 220 DPI)

1  
2  
3  
4  
5  
6  
7  
8  
9  
10  
11  
12  
13  
14  
15  
16  
17  
18  
19  
20  
21  
22  
23  
24  
25  
26  
27  
28  
29  
30  
31  
32  
33  
34  
35  
36  
37  
38  
39  
40  
41  
42  
43  
44  
45  
46  
47  
48  
49  
50  
51  
52  
53  
54  
55  
56  
57  
58  
59  
60

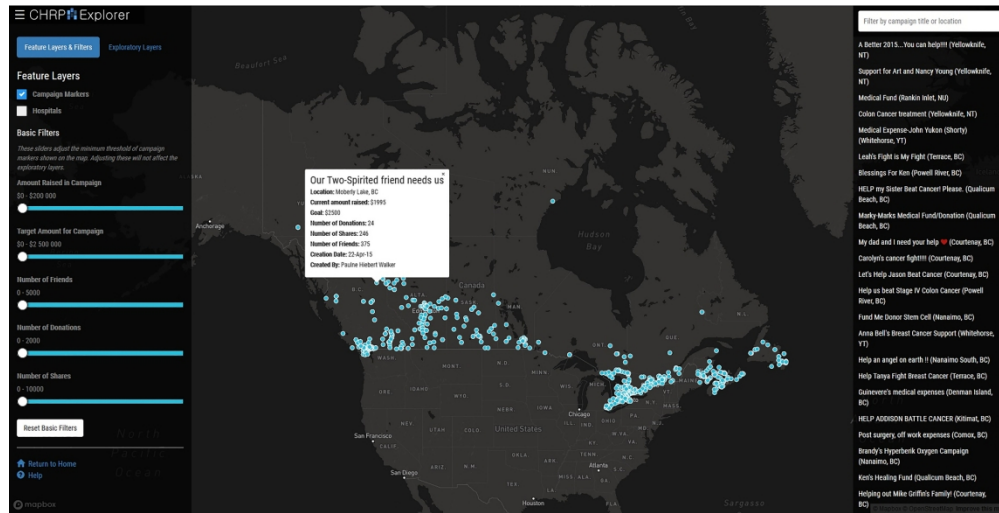

225x114mm (220 x 220 DPI)

1  
2  
3  
4  
5  
6  
7  
8  
9  
10  
11  
12  
13  
14  
15  
16  
17  
18  
19  
20  
21  
22  
23  
24  
25  
26  
27  
28  
29  
30  
31  
32  
33  
34  
35  
36  
37  
38  
39  
40  
41  
42  
43  
44  
45  
46  
47  
48  
49  
50  
51  
52  
53  
54  
55  
56  
57  
58  
59  
60

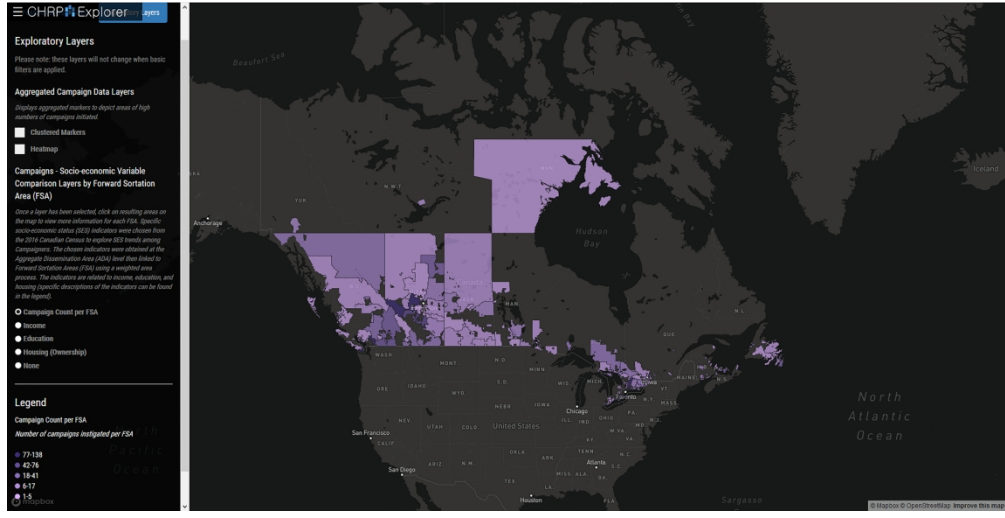

227x115mm (220 x 220 DPI)



1  
2  
3  
4  
5  
6  
7  
8  
9  
10  
11  
12  
13  
14  
15  
16  
17  
18  
19  
20  
21  
22  
23  
24  
25  
26  
27  
28  
29  
30  
31  
32  
33  
34  
35  
36  
37  
38  
39  
40  
41  
42  
43  
44  
45  
46  
47  
48  
49  
50  
51  
52  
53  
54  
55  
56  
57  
58  
59  
60

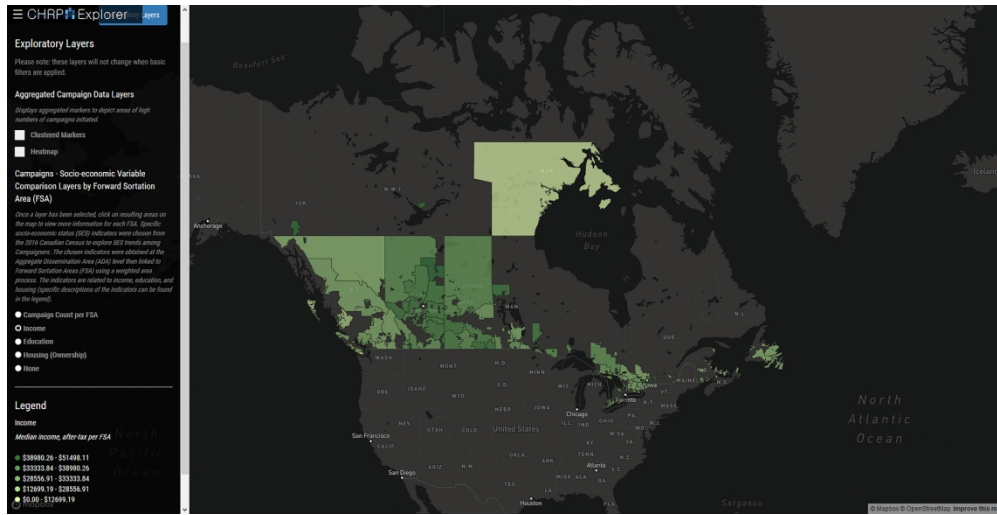

229x116mm (220 x 220 DPI)

1  
2  
3  
4  
5  
6  
7  
8  
9  
10  
11  
12  
13  
14  
15  
16  
17  
18  
19  
20  
21  
22  
23  
24  
25  
26  
27  
28  
29  
30  
31  
32  
33  
34  
35  
36  
37  
38  
39  
40  
41  
42  
43  
44  
45  
46  
47  
48  
49  
50  
51  
52  
53  
54  
55  
56  
57  
58  
59  
60

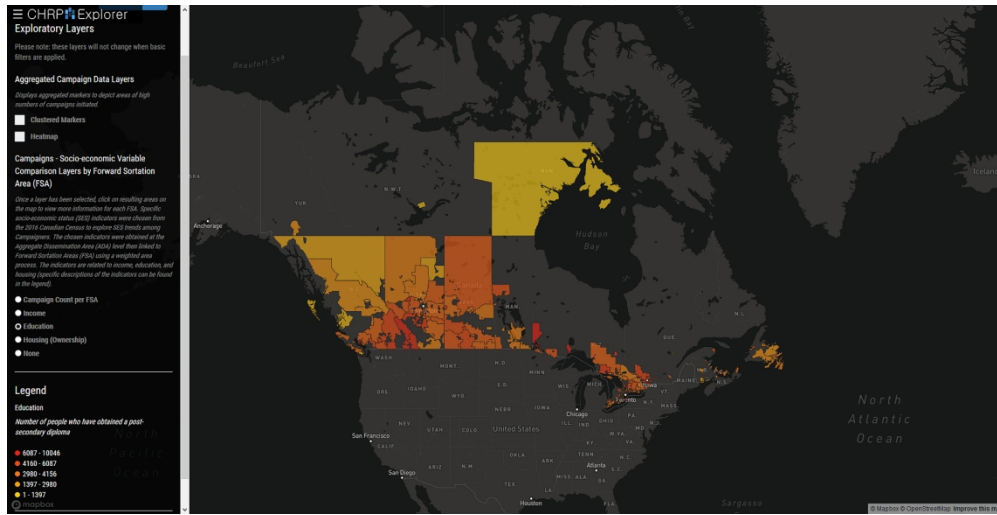

228x116mm (220 x 220 DPI)

1  
2  
3  
4  
5  
6  
7  
8  
9  
10  
11  
12  
13  
14  
15  
16  
17  
18  
19  
20  
21  
22  
23  
24  
25  
26  
27  
28  
29  
30  
31  
32  
33  
34  
35  
36  
37  
38  
39  
40  
41  
42  
43  
44  
45  
46  
47  
48  
49  
50  
51  
52  
53  
54  
55  
56  
57  
58  
59  
60

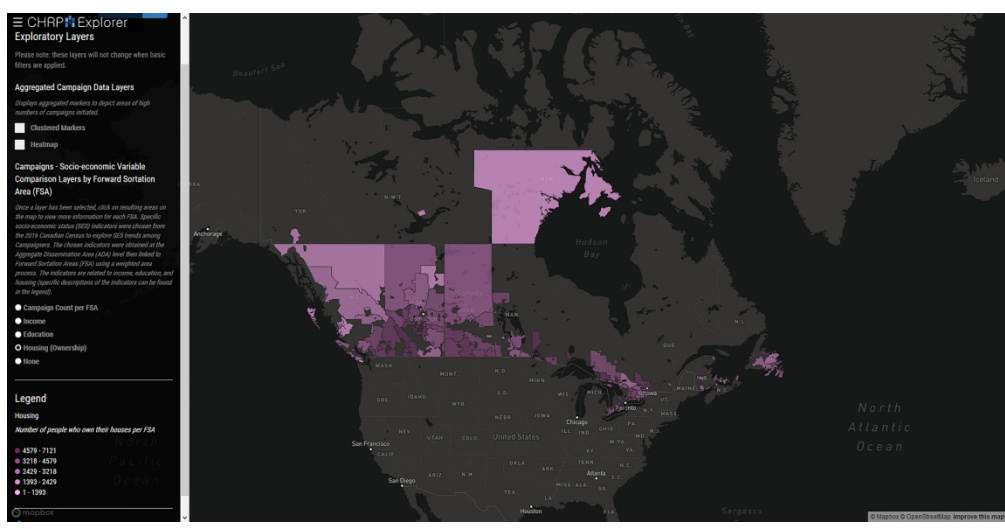

230x117mm (220 x 220 DPI)

## Standards for Reporting Qualitative Research (SRQR)\*

<http://www.equator-network.org/reporting-guidelines/srqr/>

Page/line no(s).

### Title and abstract

|                                                                                                                                                                                                                                                              |      |
|--------------------------------------------------------------------------------------------------------------------------------------------------------------------------------------------------------------------------------------------------------------|------|
| <p><b>Title</b> - Concise description of the nature and topic of the study Identifying the study as qualitative or indicating the approach (e.g., ethnography, grounded theory) or data collection methods (e.g., interview, focus group) is recommended</p> | p. 1 |
| <p><b>Abstract</b> - Summary of key elements of the study using the abstract format of the intended publication; typically includes background, purpose, methods, results, and conclusions</p>                                                               | p. 2 |

### Introduction

|                                                                                                                                                                     |      |
|---------------------------------------------------------------------------------------------------------------------------------------------------------------------|------|
| <p><b>Problem formulation</b> - Description and significance of the problem/phenomenon studied; review of relevant theory and empirical work; problem statement</p> | p. 4 |
| <p><b>Purpose or research question</b> - Purpose of the study and specific objectives or questions</p>                                                              | p. 4 |

### Methods

|                                                                                                                                                                                                                                                                                                                                                                                                             |         |
|-------------------------------------------------------------------------------------------------------------------------------------------------------------------------------------------------------------------------------------------------------------------------------------------------------------------------------------------------------------------------------------------------------------|---------|
| <p><b>Qualitative approach and research paradigm</b> - Qualitative approach (e.g., ethnography, grounded theory, case study, phenomenology, narrative research) and guiding theory if appropriate; identifying the research paradigm (e.g., postpositivist, constructivist/ interpretivist) is also recommended; rationale**</p>                                                                            | pp. 5-7 |
| <p><b>Researcher characteristics and reflexivity</b> - Researchers' characteristics that may influence the research, including personal attributes, qualifications/experience, relationship with participants, assumptions, and/or presuppositions; potential or actual interaction between researchers' characteristics and the research questions, approach, methods, results, and/or transferability</p> | N/A     |
| <p><b>Context</b> - Setting/site and salient contextual factors; rationale**</p>                                                                                                                                                                                                                                                                                                                            | pp. 5-7 |
| <p><b>Sampling strategy</b> - How and why research participants, documents, or events were selected; criteria for deciding when no further sampling was necessary (e.g., sampling saturation); rationale**</p>                                                                                                                                                                                              | pp. 5-7 |
| <p><b>Ethical issues pertaining to human subjects</b> - Documentation of approval by an appropriate ethics review board and participant consent, or explanation for lack thereof; other confidentiality and data security issues</p>                                                                                                                                                                        | N/A     |
| <p><b>Data collection methods</b> - Types of data collected; details of data collection procedures including (as appropriate) start and stop dates of data collection and analysis, iterative process, triangulation of sources/methods, and modification of procedures in response to evolving study findings; rationale**</p>                                                                             | pp. 5-7 |

|    |                                                                                         |         |
|----|-----------------------------------------------------------------------------------------|---------|
| 1  |                                                                                         |         |
| 2  |                                                                                         |         |
| 3  | <b>Data collection instruments and technologies</b> - Description of instruments (e.g., |         |
| 4  | interview guides, questionnaires) and devices (e.g., audio recorders) used for data     |         |
| 5  | collection; if/how the instrument(s) changed over the course of the study               | pp. 5-7 |
| 6  |                                                                                         |         |
| 7  | <b>Units of study</b> - Number and relevant characteristics of participants, documents, |         |
| 8  | or events included in the study; level of participation (could be reported in results)  | pp. 5-7 |
| 9  |                                                                                         |         |
| 10 | <b>Data processing</b> - Methods for processing data prior to and during analysis,      |         |
| 11 | including transcription, data entry, data management and security, verification of      |         |
| 12 | data integrity, data coding, and anonymization/de-identification of excerpts            | Pp. 5-7 |
| 13 |                                                                                         |         |
| 14 | <b>Data analysis</b> - Process by which inferences, themes, etc., were identified and   |         |
| 15 | developed, including the researchers involved in data analysis; usually references a    |         |
| 16 | specific paradigm or approach; rationale**                                              | Pp. 5-7 |
| 17 |                                                                                         |         |
| 18 | <b>Techniques to enhance trustworthiness</b> - Techniques to enhance trustworthiness    |         |
| 19 | and credibility of data analysis (e.g., member checking, audit trail, triangulation);   |         |
| 20 | rationale**                                                                             | Pp. 5-7 |

## Results/findings

|    |                                                                                             |         |
|----|---------------------------------------------------------------------------------------------|---------|
| 23 | <b>Synthesis and interpretation</b> - Main findings (e.g., interpretations, inferences, and |         |
| 24 | themes); might include development of a theory or model, or integration with                |         |
| 25 | prior research or theory                                                                    | pp. 7-9 |
| 26 |                                                                                             |         |
| 27 | <b>Links to empirical data</b> - Evidence (e.g., quotes, field notes, text excerpts,        |         |
| 28 | photographs) to substantiate analytic findings                                              | pp. 7-9 |

## Discussion

|    |                                                                                           |           |
|----|-------------------------------------------------------------------------------------------|-----------|
| 32 | <b>Integration with prior work, implications, transferability, and contribution(s) to</b> |           |
| 33 | <b>the field</b> - Short summary of main findings; explanation of how findings and        |           |
| 34 | conclusions connect to, support, elaborate on, or challenge conclusions of earlier        |           |
| 35 | scholarship; discussion of scope of application/generalizability; identification of       |           |
| 36 | unique contribution(s) to scholarship in a discipline or field                            | pp. 9-10  |
| 37 |                                                                                           |           |
| 38 | <b>Limitations</b> - Trustworthiness and limitations of findings                          | pp. 10-11 |

## Other

|    |                                                                                            |       |
|----|--------------------------------------------------------------------------------------------|-------|
| 42 | <b>Conflicts of interest</b> - Potential sources of influence or perceived influence on    |       |
| 43 | study conduct and conclusions; how these were managed                                      | p. 12 |
| 44 |                                                                                            |       |
| 45 | <b>Funding</b> - Sources of funding and other support; role of funders in data collection, |       |
| 46 | interpretation, and reporting                                                              | p. 13 |

\*The authors created the SRQR by searching the literature to identify guidelines, reporting standards, and critical appraisal criteria for qualitative research; reviewing the reference lists of retrieved sources; and contacting experts to gain feedback. The SRQR aims to improve the transparency of all aspects of qualitative research by providing clear standards for reporting qualitative research.

1  
2  
3  
4  
5  
6  
7  
8  
9  
10  
11  
12  
13  
14  
15  
16  
17  
18  
19  
20  
21  
22  
23  
24  
25  
26  
27  
28  
29  
30  
31  
32  
33  
34  
35  
36  
37  
38  
39  
40  
41  
42  
43  
44  
45  
46  
47  
48  
49  
50  
51  
52  
53  
54  
55  
56  
57  
58  
59  
60

\*\*The rationale should briefly discuss the justification for choosing that theory, approach, method, or technique rather than other options available, the assumptions and limitations implicit in those choices, and how those choices influence study conclusions and transferability. As appropriate, the rationale for several items might be discussed together.

**Reference:**

O'Brien BC, Harris IB, Beckman TJ, Reed DA, Cook DA. **Standards for reporting qualitative research: a synthesis of recommendations.** *Academic Medicine*, Vol. 89, No. 9 / Sept 2014  
DOI: 10.1097/ACM.0000000000000388

For peer review only

# BMJ Open

## Spatially Exploring the Intersection of Socio-Economic Status and Canadian Cancer-Related Medical Crowdfunding Campaigns

|                                 |                                                                                                                                                                                                                                                                                                                       |
|---------------------------------|-----------------------------------------------------------------------------------------------------------------------------------------------------------------------------------------------------------------------------------------------------------------------------------------------------------------------|
| Journal:                        | <i>BMJ Open</i>                                                                                                                                                                                                                                                                                                       |
| Manuscript ID                   | bmjopen-2018-026365.R1                                                                                                                                                                                                                                                                                                |
| Article Type:                   | Research                                                                                                                                                                                                                                                                                                              |
| Date Submitted by the Author:   | 09-Mar-2019                                                                                                                                                                                                                                                                                                           |
| Complete List of Authors:       | van Duynhoven , Alysha; Simon Fraser University<br>Lee, Anthony; Simon Fraser University<br>Michel , Ross; Simon Fraser University<br>Snyder, Jeremy; Simon Fraser University<br>Crooks, Valorie; Simon Fraser University<br>Chow-White, Peter; Simon Fraser University<br>Schuurman, Nadine; Simon Fraser University |
| <b>Primary Subject Heading</b>: | Health services research                                                                                                                                                                                                                                                                                              |
| Secondary Subject Heading:      | Ethics, Health policy                                                                                                                                                                                                                                                                                                 |
| Keywords:                       | Crowdfunding, Equity, Spatial Analysis                                                                                                                                                                                                                                                                                |
|                                 |                                                                                                                                                                                                                                                                                                                       |

SCHOLARONE™  
Manuscripts

1  
2  
3  
4  
5  
6  
7  
8  
9  
10  
11  
12  
13  
14  
15  
16  
17  
18  
19  
20  
21  
22  
23  
24  
25  
26  
27  
28  
29  
30  
31  
32  
33  
34  
35  
36  
37  
38  
39  
40  
41  
42  
43  
44  
45  
46  
47  
48  
49  
50  
51  
52  
53  
54  
55  
56  
57  
58  
59  
60

1 **Spatially Exploring the Intersection of Socio-Economic Status and Canadian Cancer-Related**  
2 **Medical Crowdfunding Campaigns**

4 Alysha van Duynhoven (Department of Geography, Simon Fraser University, Burnaby BC Canada)  
5 Anthony Lee (Department of Geography, Simon Fraser University, Burnaby BC Canada)  
6 Ross Michel (Department of Geography, Simon Fraser University, Burnaby BC Canada)  
7  
8 Jeremy Snyder (Faculty of Health Sciences, Simon Fraser University)  
9 8888 University Drive; Blusson Hall 10516; Burnaby BC V5A 1S6 Canada; [jcs12@sfu.ca](mailto:jcs12@sfu.ca); 778-782-3258  
10  
11 Valorie A. Crooks (Department of Geography, Simon Fraser University, Burnaby BC Canada)  
12 Peter Chow-White (School of Communication, Simon Fraser University, Burnaby BC Canada)  
13 Nadine Schuurman (Department of Geography, Simon Fraser University, Burnaby BC Canada)

15 Keywords: Crowdfunding; Equity; Cancer; Spatial Analysis  
16 Word Count: 2947



## 29 Abstract

30 **Objectives:** Medical crowdfunding is a rapidly growing practice where individuals leverage social  
31 networks to raise money for health-related needs. This practice has allowed many to access health care  
32 and avoid medical debt but has also raised a number of ethical concerns. A dominant criticism of this  
33 practice is that it is likely to increase inequities in access to healthcare if persons from relatively wealthy  
34 backgrounds, media connections, tech savvy, and educational attainments are best positioned to use and  
35 succeed with crowdfunding. However, limited data has been published to support this claim. Our  
36 objective in this paper is to assess this concern using socio-economic data and information from  
37 crowdfunding campaigns.

38 **Setting:** To assess this concern, we present an exploratory spatial analysis of a new dataset of  
39 crowdfunding campaigns for cancer-related care by Canadian residents.

40 **Participants:** Four datasets were used: 1) a medical crowdfunding dataset that included cancer-related  
41 campaigns posted by Canadians; 2) 2016 Census Profile for aggregate dissemination areas; 3) aggregate  
42 dissemination area boundaries; and 4) forward sortation area boundaries.

43 **Results:** Our exploratory spatial analysis demonstrates that use of crowdfunding for cancer-related needs  
44 in Canada corresponds with high income, home ownership, and high educational attainment. Campaigns  
45 were also commonly located near city centres.

46 **Conclusions:** These findings support concerns that those in positions of relative socio-economic privilege  
47 disproportionately utilize crowdfunding to address health-related needs. This study was not able to  
48 determine whether other socio-economic dimensions such as race, gender, ethnicity, nationality, and  
49 linguistic fluency are also correlated with use of medical crowdfunding. Thus, we call for further research  
50 to explore the relationship between socio-economic variables and medical crowdfunding campaigning to  
51 explore these other socio-economic variables and campaigns for needs unrelated to cancer.

## 53 Strengths and Limitations of this Study

54 Developed large dataset of crowdfunding data

55 Presents methods for analyzing datasets of crowdfunding campaign information

56 Links data on crowdfunding campaigns to data on income, home ownership, and education levels

57 Unable to determine whether race, gender, ethnicity, nationality, or linguistic fluency impact use of  
58 crowdfunding

59

60

61

62

63

64

## 65 Introduction

66 Individuals and groups have increasingly turned to online social networking and social media platforms to  
67 fundraise. This practice has come to be popularly known as crowdfunding. In particular, charitable  
68 crowdfunding, as opposed to entrepreneurial fundraising intended to raise money for businesses, has  
69 developed as a means for individuals or small groups to finance their personal needs. These platforms  
70 host campaigns, including text, images, and video, facilitate outreach to potential donors via social media,  
71 and process donations.

72 The crowdfunding platform GoFundMe dominates the charitable crowdfunding sector. Before it  
73 recently acquired YouCaring, the second largest social crowdfunding platform, it controlled 90% of the  
74 charitable crowdfunding business in the United States (US) and 80% globally [1,2]. Launched in 2010,  
75 US\$ 5 billion has been raised via GoFundMe to date and this platform supports a community consisting  
76 of more than 50 million donors and users [1]. Campaigns for health-related purposes comprise the largest  
77 proportion of fundraisers hosted by GoFundMe [2,3]. These medical crowdfunding campaigns are  
78 thought to be used to pay for essential services for those lacking comprehensive medical insurance,  
79 elective procedures not covered by insurance, and unproven or experimental medical treatments. They are  
80 also used to pay for indirect needs related to receiving medical care, including travel to receive care,  
81 compensation for time off from work, and payments for medical equipment [3]. The use of crowdfunding  
82 platforms for medical purposes is expected to continue to grow and thus have a substantial impact on how  
83 individuals access health-related care [3,4].

84 Successful medical crowdfunders can benefit greatly from being better able to obtain health-  
85 related support via crowdfunding. However, this practice has also been the target of considerable  
86 criticism. These concerns include worries about fraudulent campaigns, loss of medical privacy, and  
87 encouraging the privatization of healthcare [3,4]. Arguably the most common and serious critique of  
88 medical crowdfunding is that it will exacerbate existing inequities in who is ultimately able to  
89 (financially) access health care. While differential access to health care is shaped by each community's

1  
2  
3 90 health and social care system, insurance coverage, and demographics, in general those in positions of  
4  
5 91 socio-economic privilege, even in universal health systems, have relatively better access to health-related  
6  
7 92 care than their less privileged compatriots. Medical crowdfunding could exacerbate this problem, it is  
8  
9 93 argued, if crowdfunding serves to reward recipients according to their popularity, extent of social  
10  
11 94 networks, technological capabilities, or media savvy rather than need [5]. For example, Young and  
12  
13 95 Scheinberg [4 p. 1623] flag the “potential for unfairly advantaging those with the means to engage with  
14  
15 96 online tools and tap into large social networks, which may lead to an underrepresentation of cases with  
16  
17 97 the greatest need in which patients lack the tools to coordinate effective crowdfunding campaigns.”  
18  
19 98 Similarly, critics express that medical crowdfunding is likely to reinforce existing inequalities in class and  
20  
21 99 power [6] and reward those with social connections to wealthy persons, media connections, and the  
22  
23 100 educational attainments needed to communicate effectively online [7]. Others note that placing the  
24  
25 101 distribution of medical funds in the hands of private crowdfunding platforms has problematic effects, as  
26  
27 102 when these companies prohibit fundraisers for certain services and procedures such as abortion or  
28  
29 103 promote and donate to specific fundraisers (as in the case of the parents of Charlie Gard fundraising for an  
30  
31 104 unproven medical treatment) [8,9,10].

32  
33  
34  
35 105 Empirical support for the criticism that medical crowdfunding mostly benefits those who are  
36  
37 106 socio-economically advantaged is thus far limited. Lukk, Schneiderhan, and Soares reviewed 319  
38  
39 107 crowdfunding campaigns by Canadians for services related to education and healthcare [11]. They found  
40  
41 108 that older and visible minority Canadians were relatively less successful in these campaigns. Berliner and  
42  
43 109 Kenworthy examined 200 medical crowdfunding campaigns and found correlations between success in  
44  
45 110 meeting medical crowdfunding goals and the inclusion of photos and videos, campaign updates, and  
46  
47 111 interactions including comments, social media shares, and ‘liking’ a campaign [12]. A review of 850  
48  
49 112 campaigns for services related to organ transplantation found that campaigns with positive emotional  
50  
51 113 sentiment tend to be relatively successful [13]. An analysis of 410 crowdfunding campaigns for medical  
52  
53 114 transition and gender affirming surgeries and treatments demonstrated that campaigners that are young,

1  
2  
3 115 white, and transgender men raise more than others in this area but that campaigns for medical transition  
4  
5 116 perform less well than medical crowdfunding campaigns generally [14].  
6

7 117 Here we present an exploratory analysis of a new dataset of crowdfunding campaigns for cancer-  
8  
9 118 related care by Canadian residents that is connected to a selection of demographic information from the  
10  
11 119 2016 Canadian Census to explore the relationship between campaign use and socio-economic status. We  
12  
13 120 captured this medical crowdfunding dataset using an automated data crawling program and machine  
14  
15 121 learning techniques. We specifically examine crowdfunding campaigns for cancer-related care as existing  
16  
17 122 research has already documented the commonality of such campaigns in Canada [15,16,17], and we  
18  
19 123 contrast these campaigns against geo-demographic trends using an exploratory spatial data analysis  
20  
21 124 (ESDA) approach. ESDA facilitates the investigation of prior assumptions and guides the identification of  
22  
23 125 spatial patterns [18,19]. We use these patterns to raise important new research questions about medical  
24  
25 126 crowdfunding in the discussion.  
26  
27  
28

## 29 127 **Materials and Methods**

30  
31 128 We utilized four datasets in this exploratory analysis: 1) a medical crowdfunding dataset that included  
32  
33 129 cancer-related campaigns posted by Canadians; 2) 2016 Census Profile for aggregate dissemination areas;  
34  
35 130 3) aggregate dissemination area boundaries; and 4) forward sortation area boundaries. In consultation  
36  
37 131 with the Simon Fraser University Research Ethics Board we determined that ethics approval was not  
38  
39 132 required for this project under locally relevant Tri-Council policy (article 2.2) as the data being collected  
40  
41 133 and used was publicly accessible with no reasonable expectation of privacy given the nature of  
42  
43 134 crowdfunding as an activity [20]. While not required by local research ethics regulations, we have chosen  
44  
45 135 not to publish any identifiable details from the scraped campaigns in the interest of the privacy of  
46  
47 136 campaign recipients.  
48  
49

50  
51 137 We compiled a medical crowdfunding dataset by creating an automated web crawling algorithm.  
52  
53 138 To do this we developed a Python based automated web crawler that scraped the GoFundMe platform  
54  
55 139 looking for key words or strings of words – in this case, the keyword ‘cancer’ – and postal codes  
56  
57

1  
2  
3 140 identifying campaigns as originating within Canada. The search took place on June 11, 2006. Any  
4  
5 141 ambiguous posts were read by the researchers to determine if they fit the classification and  
6  
7 142 should be included. After relevant campaigns were identified, we used a SQL database server to store  
8  
9 143 the site in HTML form for further analysis. Once the full HTML files from each campaign were retrieved,  
10  
11 144 the pages were then parsed to remove HTML tags. Further cleaning and labeling took place using a  
12  
13 145 machine learning algorithm designed to find and include any missing information or attributes of the  
14  
15 146 campaigns related to cancer. From this process campaigns not listed in the ‘medical’ category were  
16  
17 147 excluded. The final records were stored in a Redis database for access by simple query for analysis. The  
18  
19 148 dataset used in this study contains 1788 records from May 2012 to June 2016 pertaining to cancer-related  
20  
21 149 campaigns created by Canadians.  
22  
23

24  
25 150 Aggregate dissemination areas (ADAs) are a new census product released by Statistics Canada as  
26  
27 151 part of the 2016 Canadian Census. Delineation of ADAs considers boundaries of previous census  
28  
29 152 products, including existing census divisions, census metropolitan areas, and census tracts [21]. Forward  
30  
31 153 sortation areas (FSAs) are administrative boundaries determined by Canada Post [22]. They are  
32  
33 154 alphanumerically represented by “the first three characters in a Canadian postal code” [22]. The records  
34  
35 155 contained in our crowdfunding dataset described above have an FSA attribute. This geographic data unit  
36  
37 156 enables ESDA. Boundaries of ADAs and FSAs were obtained from Statistics Canada [23].  
38  
39

40 157 Socio-economic status and its correlation with an individual's health or ability to obtain  
41  
42 158 treatments have been previously assessed at a FSA level [24,25,26], which is why we opted to explore  
43  
44 159 socio-economic status indicators. Variables related to income, education, and housing were chosen and  
45  
46 160 obtained using the University of Toronto’s Canadian Census Analyser at the ADA level (see Table 1 for  
47  
48 161 exact variables obtained) [27]. Further data pre-processing and transformations were required in order to  
49  
50 162 link socio-economic data to FSAs due to current data limitations.  
51  
52

53 163

54  
55 164 \*\* insert Table 1 here \*\*  
56  
57

1  
2  
3 165  
4  
5 166 Profile and boundary datasets for FSAs are unavailable for the Statistics Canada 2016 Census  
6  
7 167 data. In lieu of the FSAs, we computed the weighted average of socio-economic variables based on the  
8  
9 168 percent of spatial overlap between ADAs and FSAs. To prepare for this conversion, ADAs were spatially  
10  
11 169 joined with data retrieved from the 2016 Census Profile. Each FSA is also joined with respective  
12  
13 170 campaign frequencies (see Figure 1 for the high-level description of conversion procedure utilized to add  
14  
15 171 socio-economic data at ADA-level to FSA-level). Once the relationship matrix was generated from the  
16  
17 172 function `GenerateWeights`, it was then retrieved and used to calculate weighted averages of socio-  
18  
19 173 economic variables contained in each intersecting ADA. These weighted socio-economic variables were  
20  
21 174 appended to each respective FSA.  
22  
23  
24

25 175 \*\* insert Figure 1 here \*\*  
26  
27 176  
28  
29

30 177 Using ArcMap from the ArcGIS suite (version 10.5), quintiles were created using natural breaks.  
31  
32 178 The data were categorized as quintiles as we trusted that five classes would be sufficient to showcase  
33  
34 179 meaningful differences while minimizing complexity of visual results. These quintiles were used in  
35  
36 180 cartographic representations to support ESDA tasks. Visual comparisons at regional and provincial levels  
37  
38 181 were then conducted with regards to income, education, and housing ownership. The creation of these  
39  
40 182 quintiles allowed project correspondents to examine the data for geographic trends. These cartographic  
41  
42 183 products enabled the significance of these socio-economic variables to be gauged for medical  
43  
44 184 crowdfunding.  
45  
46

47 185 Campaigns for each FSA were counted, and these frequencies were assigned to their respective  
48  
49 186 boundaries. These FSAs were subsequently linked with ADAs that feature census variables from the 2016  
50  
51 187 Canadian Census. These variables consisted of income, number of persons who have completed post-  
52  
53 188 secondary education, and home ownership. These linkages were informed by research conducted by  
54  
55 189 Rogers [28] in which these variables were shown to be commonly associated with vulnerability with  
56  
57  
58  
59  
60

1  
2  
3 190 regard to health and healthcare. To link these datasets, the variables were weighted based on the percent  
4  
5 191 of areal overlap each ADA shares with each FSA. The resulting weighted attributes were then divided  
6  
7 192 into quintiles using a method similar to Sothorn et al. [29]. Resulting quintiles were then visualized in an  
8  
9 193 interactive cartographic display, or web map, enabling geographic comparisons to be made. This map can  
10  
11 194 be viewed at: <https://www.crowdfundingforhealth.org/chrpexplorer>. Figure 2 describes the process for  
12  
13 195 users of CHRP to explore the ESDA results. Figure 3 shows an image of the web map interface.

14  
15  
16 196 \*\* insert Figure 2 here \*\*  
17

18 197  
19  
20 198 \*\* insert Figure 3 here \*\*  
21

#### 22 199 23 24 200 *Patient and Public Involvement*

25  
26 201 As the information analyzed in this study was publicly available, patients were not recruited for or  
27  
28 202 actively involved in this study.  
29

#### 30 203 31 32 33 204 **Results**

34  
35 205 Our exploratory analysis utilizes socio-economic variables that have been linked with FSAs. These  
36  
37 206 include a layer of campaign counts per FSA, income, education, and housing (see Figures 4, 5, 6, & 7 for  
38  
39 207 screen captures).

40  
41 208 \*\* insert Figure 4 here \*\*  
42

43 209 \*\* insert Figure 5 here \*\*  
44

45 210 \*\* insert Figure 6 here \*\*  
46

47 211 \*\* insert Figure 7 here \*\*  
48  
49

50 212  
51  
52 213 In addition to the web map, a table was generated that showed the proportion of crowdfunding campaigns  
53  
54 214 that belong in each quintile for each socio-economic variable (see Tables 2, 3, 4, & 5).  
55  
56  
57



215

216

\*\* insert Table 2 here \*\*

217

\*\* insert Table 3 here \*\*

218

\*\* insert Table 4 here \*\*

219

\*\* insert Table 5 here \*\*

220

221

It is important to note that only 176 FSAs out of the 1620 FSAs in Canada contained at least one

222

crowdfunding campaign, with the population of these FSAs representing approximately 5% of the

223

national total. A separate table shows the distribution of the crowdfunding campaigns between each

224

Canadian province and territory and the average value of each socio-economic variable within each

225

administrative division (see Table 6).

226

227

\*\* insert Table 6 here \*\*

228

229

The average income of crowdfunding campaigners in this dataset is within middle to high level

230

FSAs, with 65.49% of campaigns being located in FSAs within the three highest quintiles in the income

231

category (see Table 3). These higher income levels are matched by higher rates of home ownership

232

among these campaigners, with housing ownership values being larger in the middle quintile (see Table

233

5). This group also tends to be well educated, with education values tending toward the higher quintiles

234

(see Table 4).

235

Collectively, our ESDA shows that use of cancer-related medical crowdfunding is occurring

236

unevenly across the country relative to population distribution. For example, Canadians' cancer-related

237

crowdfunding campaigns were also commonly located in close proximity to city centres (see Figure 3).

238

Provincial differences in campaign use also exist. Campaigns were more commonly posted in the

239

provinces of Ontario and British Columbia and less so in the Atlantic provinces. There is a noticeable

240

density of campaigns in the prairie provinces of Alberta and Saskatchewan.



1  
2  
3 2414  
5 242 **Discussion**

6  
7 243 Our ESDA-based findings support existing concerns that persons in positions of relative socio-economic  
8  
9 244 privilege disproportionately utilize crowdfunding to address health-related needs – in this case care  
10  
11 245 related to cancer. Individuals in the highest income FSAs were found to be the heaviest users of medical  
12  
13 246 crowdfunding for cancer-related campaigns, as were individuals in FSAs with high rates of home  
14  
15 247 ownership. These ESDA-based interpretations support the idea that wealthier individuals are more likely  
16  
17 248 to see crowdfunding as a way to draw together financial resources from elsewhere to meet their health  
18  
19 249 needs. We also observed that individuals in FSAs with higher rates of education turned more frequently to  
20  
21 250 medical crowdfunding. This ESDA-based interpretation supports existing claims that individuals who are  
22  
23 251 better educated, more familiar with online technologies, and better able to express themselves online are  
24  
25 252 more likely to take advantage of crowdfunding to address health-related needs. The positive correlation  
26  
27 253 between the amount raised in a campaign and number of times the campaign was shared supports the  
28  
29 254 speculation that social capital and tech-savviness are important constituents of crowdfunding campaign  
30  
31 255 success.

32  
33  
34  
35 256 Our exploration of geo-demographic trends regarding Canadians' use of cancer-related  
36  
37 257 crowdfunding shows that this is a highly urban phenomenon. This is somewhat counterintuitive  
38  
39 258 considering the extensive health service gaps in rural Canadian communities that drive some residents to  
40  
41 259 consider alternative ways to access necessary care [30], such as crowdfunding for the costs of private  
42  
43 260 treatment or to relocate to an urban centre. Research regarding a potential urban-rural divide in  
44  
45 261 crowdfunding use is very limited and so it is difficult to know why there can be proportionately less use  
46  
47 262 in rural areas. This may be due to limited access to technology or lower levels of education in rural  
48  
49 263 Canadian communities [31,32]. Alternatively, it may be due to the strong voluntary and informal care  
50  
51 264 sectors that 'tight-knit' rural communities are so well known for that would lead to residents pulling  
52  
53 265 together to support those in need [30,33], which would lessen the need for drawing on disparate social  
54  
55 266 networks via crowdfunding. It is important to note, however, that our ESDA approach means that we

1  
2  
3 267 cannot conclusively state that our analysis documents a clear urban-rural divide. This is due in part to the  
4  
5 268 large aggregations of FSAs as well as the sparse population of Nunavut that can both over- and under-  
6  
7 269 estimate socio-economic variables. We thus flag this as an important issue for future medical  
8  
9 270 crowdfunding research. Furthermore, factors distinctive to the Canadian cultural, geographic, and  
10  
11 271 healthcare context may mean that these specific results are not applicable elsewhere. These factors  
12  
13 272 include widespread access to basic cancer care through the Canadian single payer health system, cultural  
14  
15 273 differences in charitable giving, and the geographically disparate nature of Canadian communities. These  
16  
17 274 differences may be less acute in European communities with greater access to public health insurance and  
18  
19 275 greater in the US and other countries with more limited public provision of care but requires additional  
20  
21 276 investigation in other settings.  
22  
23

24 277 While our interpretations of the ESDA results support the general concern that medical  
25  
26 278 crowdfunding will tend to exacerbate socio-economic inequities in access to health-related care, only  
27  
28 279 certain dimensions of this critique were explored here. For example, while we found positive correlations  
29  
30 280 between cancer-related crowdfunding and wealth and education levels, we were not able to explore  
31  
32 281 whether other dimensions of socio-economic privilege are positively correlated. These dimensions  
33  
34 282 include race, gender, ethnicity, nationality, and linguistic fluency, all of which are factors that lead to  
35  
36 283 inequities in health status [34,35]. This leads us to make three important points. First, we acknowledge  
37  
38 284 that it is possible that only certain dimensions of socio-economic privilege correlate with using  
39  
40 285 crowdfunding to address health-related needs, and that some or all of those not explored here do not shape  
41  
42 286 medical crowdfunding use in the ways documented here. Second, and because of this, it is important to  
43  
44 287 explicitly state that this exploratory analysis supports the hypothesis of a more general correlation but  
45  
46 288 does not provide direct evidence supporting every dimension of this correlation. And third, we call for  
47  
48 289 further research to explore the relationship between socio-economic variables and medical crowdfunding  
49  
50 290 use in general or for cancer-related campaigns in order to assist with developing a more robust  
51  
52 291 understanding of any interrelationships.  
53  
54

55  
56 292 *Limitations*  
57  
58  
59  
60

1  
2  
3 293 Only the first three digits of postal codes were included in the dataset of crowdfunding campaigns, which  
4  
5 294 were then linked to FSAs. FSAs are smaller in urban areas and may be geographically vast in rural areas.  
6  
7 295 Linking ADAs to FSAs could result in broad generalizations and aggregation errors and lead to ecological  
8  
9 296 fallacies. This implies that findings from our study are limited, as only broad claims can be stated. The  
10  
11 297 aforementioned generalizations could be less impacted in urban areas with smaller FSAs comparatively to  
12  
13 298 rural areas. While this has implications for our results, the impact may be reduced considering that as of  
14  
15 299 2011, over 80% of Canada's population lives in urban environments [36].

16  
17  
18 300 We acknowledge that a medical crowdfunding campaign recipient may be different from  
19  
20 301 campaign's creator. This necessitates further research with regard to the issues explored in this analysis  
21  
22 302 because campaigners may reside in or report different FSAs than the individual or family in need of  
23  
24 303 financial assistance. Further to this, postal codes are self-reported by campaign creators, which allows  
25  
26 304 typos and mistakes to be made. Nothing can be done to address this as a limitation beyond acknowledging  
27  
28 305 our awareness of the potential for errors to exist in postal code reporting. Campaigners may also have  
29  
30 306 moved to an urban centre in order to access care, thus introducing an urban bias into our sample.

31  
32  
33 307 FSAs encoded in the campaign entries dictated the primary level of aggregation for our study,  
34  
35 308 thus necessitating us to limit selection of socio-economic variables. If spatial and non-spatial attributes  
36  
37 309 were improved, more socio-economic status variables could be involved, such as sex or immigration  
38  
39 310 status. This would aid in obtaining more robust results. Another limitation encountered was the fact that  
40  
41 311 the census profiles at the FSA-level were unavailable due to accuracy issues (Statistics Canada, 2018)  
42  
43 312 [37]. To substitute, a methodology to link and weight the chosen socio-economic variables from the  
44  
45 313 ADA-level to FSA-level had to be developed.

46  
47  
48  
49 314 As our dataset was acquired for a snapshot in time, we acknowledge that campaigns have been  
50  
51 315 instantiated at different times and have been underway for varying durations. These comparisons may  
52  
53 316 impact results because the campaign duration captured in the current dataset may not be representative of  
54  
55 317 the overall success of the campaign. For example, less successful campaigns may be deleted more quickly

1  
2  
3 318 than more successful campaigns, more successful campaigns may not be removed at all, or less  
4  
5 319 technologically adept individuals may not think to delete completed campaigns. Future work may look to  
6  
7 320 compare individual campaigns that have either been run for the same length of time or have completed  
8  
9 321 their respective lifecycles on major crowdfunding platforms.  
10

11  
12 322

### 13 14 15 323 **Conclusions**

16  
17 324 The findings reported here support concerns that charitable crowdfunding will tend to advantage  
18  
19 325 relatively socio-economically privileged individuals. While supporters of medical crowdfunding point to  
20  
21 326 its potential to help people access necessary health care and avoid debt or even medical bankruptcy, this  
22  
23 327 paper demonstrates that this potential is not distributed equitably across society. While these findings do  
24  
25 328 not eliminate the advantages of medical crowdfunding, they show its limits in serving as a systematic and  
26  
27 329 fair solution to structural deficiencies in health systems. Additional research, including using the methods  
28  
29 330 described here, would help to demonstrate whether these findings are reproduced for other socio-  
30  
31 331 economic factors, in countries other than Canada, and for health needs beyond cancer.  
32  
33

34  
35 332

### 36 37 38 333 **Contributorship Statement**

39  
40  
41 334 AvD, AL, and RM contributed to developing the methods, conducting the analysis, and writing  
42  
43 335 the manuscript. JS and VAC contributed to method design, securing project funding, and writing  
44  
45 336 the manuscript. PCW contributed to data acquisition and writing the manuscript. NS contributed  
46  
47 337 to method design and writing the manuscript.  
48  
49

50  
51 338

### 52 53 54 339 **Competing Interests**

1  
2  
3 340 We declare no competing interests.  
4  
5

6 341

## 7 8 9 342 **Funding**

10  
11 343 This study was funded by the Canadian Institutes of Health Research. VAC holds the Canada Research

12  
13 344 Chair in Health Services Geographies and a Scholar Award from the Michael Smith Foundation for

14  
15 345 Health Research.  
16  
17

18  
19 346

## 20 21 347 **Data Sharing Statement**

22  
23 348 All crowdfunding data is available from the authors on request.  
24  
25  
26  
27  
28

## 29 349 **References**

- 30  
31 350 1. GoFundMe. About Us. [cited 17 July 2018]. Available from: <https://www.gofundme.com/about-us>.  
32 351 2. Harris A. GoFundMe keeps gobbling up competitors, says it's "very good for the market". Fast  
33 352 Company. 4 April 2018. Available from: [https://www.fastcompany.com/40554199/gofundme-](https://www.fastcompany.com/40554199/gofundme-keeps-gobbling-up-competitors-says-its-very-good-for-the-market)  
34 353 [keeps-gobbling-up-competitors-says-its-very-good-for-the-market](https://www.fastcompany.com/40554199/gofundme-keeps-gobbling-up-competitors-says-its-very-good-for-the-market).  
35 354 3. Snyder J, Mathers A, Crooks VA. Fund my treatment!: A call for ethics-focused social science  
36 355 research into the use of crowdfunding for medical care. *Social Science & Medicine*. 2016 Nov  
37 356 1;169:27-30.  
38 357 4. Young MJ, Scheinberg E. The rise of crowdfunding for medical care: promises and perils. *Jama*.  
39 358 2017 Apr 25;317(16):1623-4.  
40 359 5. Robinson L, Cotten SR, Ono H, Quan-Haase A, Mesch G, Chen W, Schulz J, Hale TM, Stern MJ.  
41 360 Digital inequalities and why they matter. *Information, communication & society*. 2015 May  
42 361 4;18(5):569-82.  
43 362 6. Paulus TM, Roberts KR. Crowdfunding a "Real-life Superhero": the construction of worthy bodies  
44 363 in medical campaign narratives. *Discourse, Context & Media*. 2018 Mar 1;21:64-72.  
45 364 7. Snyder J. Crowdfunding for medical care: ethical issues in an emerging health care funding  
46 365 practice. *Hastings Center Report*. 2016 Nov;46(6):36-42.  
47 366 8. Berman J., Crowdfunding site won't let crowds fund abortions, *The Huffington Post*. 2014.  
48 367 9. Charlie Gard's campaign page, Update #4, [GoFundMe.com/please-help-to-save-charlies-life](https://www.gofundme.com/please-help-to-save-charlies-life)  
49 368 10. Dressler G, Kelly SA. Ethical implications of medical crowdfunding: the case of Charlie Gard.  
50 369 *Journal of medical ethics*. 2018 Jul 1;44(7):453-7.  
51  
52  
53  
54  
55  
56  
57  
58  
59  
60

- 1  
2  
3 370 11. Lukk M, Schneiderhan E, Soares J. Worthy? Crowdfunding the Canadian Health Care and  
4 371 Education Sectors. *Canadian Review of Sociology/Revue canadienne de sociologie*. 2018  
5 372 Aug;55(3):404-24.
- 6  
7 373 12. Berliner LS, Kenworthy NJ. Producing a worthy illness: Personal crowdfunding amidst financial  
8 374 crisis. *Social Science & Medicine*. 2017 Aug 1;187:233-42.
- 9 375 13. Durand WM, Peters JL, Eltorai AE, Kalagara S, Osband AJ, Daniels AH. Medical crowdfunding  
10 376 for organ transplantation. *Clinical transplantation*. 2018 Jun;32(6):e13267.
- 11  
12 377 14. Barcelos CA. 'Bye-bye boobies': normativity, deservingness and medicalisation in transgender  
13 378 medical crowdfunding. *Culture, health & sexuality*. 2019 Feb 9:1-5.
- 14 379 15. Snyder J, Crooks VA, Mathers A, Chow-White P. Appealing to the crowd: ethical justifications in  
15 380 Canadian medical crowdfunding campaigns. *Journal of medical ethics*. 2017 Jan 30:medethics-  
16 381 2016.
- 17 382 16. The LO. Mind the gap: charity and crowdfunding in health care. *The Lancet. Oncology*. 2017  
18 383 Mar;18(3):269.
- 19 384 17. Snyder J, Chow-White P, Crooks VA, Mathers A. Widening the gap: additional concerns with  
20 385 crowdfunding in health care. *The Lancet Oncology*. 2017 May 1;18(5):e240.
- 21 386 18. Bailey TC, Gatrell AC. *Interactive spatial data analysis*. Essex: Longman Scientific & Technical;  
22 387 1995.
- 23 388 19. Haining R, Wise S, Ma J. Exploratory spatial data analysis. *Journal of the Royal Statistical*  
24 389 *Society: Series D (The Statistician)*. 1998 Sep;47(3):457-69.
- 25 390 20. Canadian Institutes of Health Research, Natural Sciences and Engineering Research Council of  
26 391 Canada, and Social Sciences and Humanities Research Council of Canada. Tri-council policy  
27 392 statement: Ethical conduct for research involving humans (TCPS2).
- 28 393 21. Statistics Canada. The aggregate dissemination area (ADA): a new census dissemination  
29 394 geographic area. [cited 23 February 2018]. Available from: [http://www12.statcan.gc.ca/census-  
30 395 recensement/2016/geo/ADA/adainfo-eng.cfm](http://www12.statcan.gc.ca/census-recensement/2016/geo/ADA/adainfo-eng.cfm)
- 31 396 22. Statistics Canada. Forward Sortation Area – Definition. [cited 23 February 2018]. Available from:  
32 397 <http://www.ic.gc.ca/eic/site/bsf-osb.nsf/eng/br03396.html>
- 33 398 23. Statistics Canada. Boundary files. [cited 23 February 2018]. Available from:  
34 399 <http://www12.statcan.gc.ca/census-recensement/2011/geo/bound-limit/bound-limit-eng.cfm>
- 35 400 24. Alter DA, Naylor CD, Austin P, Tu JV. Effects of socioeconomic status on access to invasive  
36 401 cardiac procedures and on mortality after acute myocardial infarction. *New England Journal of*  
37 402 *Medicine*. 1999 Oct 28;341(18):1359-67.
- 38 403 25. Goovaerts P. Geostatistical analysis of health data with different levels of spatial aggregation.  
39 404 *Spatial and spatio-temporal epidemiology*. 2012 Apr 1;3(1):83-92.
- 40 405 26. Kapral MK, Wang H, Mamdani M, Tu JV. Effect of socioeconomic status on treatment and  
41 406 mortality after stroke. *Stroke*. 2002 Jan 1;33(1):268-75.
- 42 407 27. Faculty of Arts & Science, University of Toronto. Canadian Census Analyser [cited 23 February  
43 408 2018]. Available from: <http://dc1.chass.utoronto.ca/census/index.html>
- 44 409 28. Rogers AC. Vulnerability, health and health care. *Journal of Advanced Nursing*. 1997  
45 410 Jul;26(1):65-72.
- 46 411 29. Southern DA, Ghali WA, Faris PD, Norris CM, Galbraith PD, Graham MM, Knudtson ML.  
47 412 Misclassification of income quintiles derived from area-based measures: A comparison of  
48 413 enumeration area and forward sortation area. *Canadian Journal of Public Health/Revue*  
49 414 *Canadienne de Sante'e Publique*. 2002 Nov 1:465-9.
- 50 415 30. Kulig JC, Williams AM, editors. *Health in rural Canada*. UBC Press; 2011 Dec 6.
- 51 416 31. Haight M, Quan-Haase A, Corbett BA. Revisiting the digital divide in Canada: the impact of  
52 417 demographic factors on access to the internet, level of online activity, and social networking site  
53 418 usage. *Information, Communication & Society*. 2014 Apr 21;17(4):503-19.

- 1  
2  
3 419 32. Friesen L, Purc-Stephenson RJ. Should I Stay or Should I Go? Perceived Barriers to Pursuing a  
4 420 University Education for Persons in Rural Areas. Canadian Journal of Higher Education.  
5 421 2016;46(1):138-55.  
6 422 33. Caxaj CS, Gill NK. Belonging and Mental Wellbeing Among a Rural Indian-Canadian Diaspora:  
7 423 Navigating Tensions in "Finding a Space of Our Own". Qualitative health research. 2017  
8 424 Jul;27(8):1119-32.  
9 425 34. Hankivsky O. Women's health, men's health, and gender and health: Implications of  
10 426 intersectionality. Social science & medicine. 2012 Jun 1;74(11):1712-20.  
11 427 35. Williams DR, Sternthal M. Understanding racial-ethnic disparities in health: sociological  
12 428 contributions. Journal of health and social behavior. 2010 Mar;51(1\_suppl):S15-27.  
13 429 36. Statistics Canada. Forward sortation areas currently being analyzed, 2016 Census. [cited 25  
14 430 February 2018]. Available from: [http://www12.statcan.gc.ca/census-recensement/2016/ref/FSA-](http://www12.statcan.gc.ca/census-recensement/2016/ref/FSA-note-eng.cfm)  
15 431 [note-eng.cfm](http://www12.statcan.gc.ca/census-recensement/2016/ref/FSA-note-eng.cfm).  
16 432 37. Statistics Canada. Population, urban and rural, by province and territory (Canada). [cited 23  
17 433 February 2018]. Available from: [http://www.statcan.gc.ca/tables-tableaux/sum-](http://www.statcan.gc.ca/tables-tableaux/sum-som/l01/cst01/demo62a-eng.htm)  
18 434 [som/l01/cst01/demo62a-eng.htm](http://www.statcan.gc.ca/tables-tableaux/sum-som/l01/cst01/demo62a-eng.htm)



435 **Tables**

| Variable                                | Data Obtained                                                                                                                                                                                                                                                  |
|-----------------------------------------|----------------------------------------------------------------------------------------------------------------------------------------------------------------------------------------------------------------------------------------------------------------|
| <b>Population and dwelling counts</b>   | Population, 2016                                                                                                                                                                                                                                               |
| <b>Income</b><br>(Total Sex / Total)    | Income statistics in 2015 for the population aged 15 years and over in private households - 100% data / Number of after-tax income recipients aged 15 years and over in private households - 100% data / Median after-tax income in 2015 among recipients (\$) |
| <b>Education</b><br>(Total Sex / Total) | Highest certificate, diploma or degree for the population aged 15 years and over in private households - 25% sample data / Postsecondary certificate, diploma or degree                                                                                        |
| <b>Housing</b><br>(Total Sex / Total)   | Private households by tenure - 25% sample data / Owner                                                                                                                                                                                                         |

436 **Table 1. Variables Obtained from 2016 Census Profiles for Aggregate Dissemination Areas.**

437 Retrieved from the Canadian Census Analyser, University of Toronto

438

| Income Quintile | Number of FSA | Percentage (FSA) | Number of Campaigns | Percentage (Campaigns) |
|-----------------|---------------|------------------|---------------------|------------------------|
| 1 - 5           | 114           | 64.77%           | 247                 | 13.81%                 |
| 6 - 17          | 36            | 20.45%           | 337                 | 18.85%                 |
| 18 - 41         | 16            | 9.09%            | 402                 | 22.48%                 |
| 42 - 76         | 6             | 3.41%            | 362                 | 20.25%                 |
| 77 - 138        | 4             | 2.27%            | 440                 | 24.61%                 |
| <b>Total</b>    | 176           | 100.00%          | 1788                | 100.00%                |

439 **Table 2. Frequency of Campaigns per FSA. Proportion of Campaigns belonging to each Quintile.**

440

| Income Quintile         | Number of FSA | Percentage (FSA) | Number of Campaigns | Percentage (Campaigns) |
|-------------------------|---------------|------------------|---------------------|------------------------|
| \$0.00 - \$12699.19     | 3             | 1.70%            | 104                 | 5.82%                  |
| \$12699.19 - \$28556.91 | 54            | 30.68%           | 513                 | 28.69%                 |
| \$28556.91 - \$33333.84 | 63            | 35.80%           | 449                 | 25.11%                 |
| \$33333.84 - \$38980.26 | 45            | 25.57%           | 593                 | 33.17%                 |
| \$38980.26 - \$51498.11 | 11            | 6.25%            | 129                 | 7.21%                  |
| <b>Total</b>            | 176           | 100.00%          | 1788                | 100.00%                |

441 **Table 3. Income, Median After-Tax (2015). Proportion of Campaigns belonging to each Quintile.**



442

| Income Quintile | Number of FSA | Percentage (FSA) | Number of Campaigns | Percentage (Campaigns) |
|-----------------|---------------|------------------|---------------------|------------------------|
| 1 - 1397        | 12            | 6.82%            | 159                 | 8.89%                  |
| 1397 - 2980     | 41            | 23.30%           | 308                 | 17.23%                 |
| 2980 - 4156     | 72            | 40.91%           | 755                 | 42.23%                 |
| 4156 - 6087     | 46            | 26.14%           | 524                 | 29.31%                 |
| 6087 - 10046    | 5             | 2.84%            | 42                  | 2.35%                  |
| <b>Total</b>    | 176           | 100.00%          | 1788                | 100.00%                |

443 **Table 4. Education, Post-Secondary. Proportion of Campaigns belonging to each Quintile.**

444

| Income Quintile | Number of FSA | Percentage (FSA) | Number of Campaigns | Percentage (Campaigns) |
|-----------------|---------------|------------------|---------------------|------------------------|
| 1 - 1393        | 17            | 9.66%            | 180                 | 10.07%                 |
| 1393 - 2429     | 38            | 21.59%           | 283                 | 15.83%                 |
| 2429 - 3218     | 68            | 38.64%           | 711                 | 39.77%                 |
| 3218 - 4579     | 48            | 27.27%           | 571                 | 31.94%                 |
| 4579 - 7121     | 5             | 2.84%            | 43                  | 2.40%                  |
| <b>Total</b>    | 176           | 100.00%          | 1788                | 100.00%                |

445 **Table 5. Housing, Owner. Proportion of Campaigns belonging to each Quintile.**

445

| Province/<br>Territory     | Number<br>of FSAs | Number of<br>Campaigns | Percentage<br>(FSA) | Percentage<br>(Campaigns) | Population | Income,<br>Median<br>After-Tax<br>(Average) | Education,<br>Post-<br>Secondary<br>(Average) | Housing,<br>Owner<br>(Average) |
|----------------------------|-------------------|------------------------|---------------------|---------------------------|------------|---------------------------------------------|-----------------------------------------------|--------------------------------|
| Alberta                    | 21                | 310                    | 11.93%              | 17.34%                    | 203643     | \$36,012.35                                 | 3393                                          | 2846                           |
| British<br>Columbia        | 32                | 401                    | 18.18%              | 22.43%                    | 268112     | \$28,716.63                                 | 3728                                          | 2599                           |
| Manitoba                   | 9                 | 66                     | 5.11%               | 3.69%                     | 83126      | \$31,275.32                                 | 3211                                          | 3032                           |
| New<br>Brunswick           | 12                | 55                     | 6.82%               | 3.08%                     | 75339      | \$26,745.83                                 | 2287                                          | 2310                           |
| Newfoundland<br>& Labrador | 9                 | 53                     | 5.11%               | 2.96%                     | 69103      | \$26,503.28                                 | 2868                                          | 2809                           |
| Northwest<br>Territories   | 1                 | 3                      | 0.57%               | 0.17%                     | 823        | \$51,498.11                                 | 415                                           | 228                            |
| Nova Scotia                | 9                 | 69                     | 5.11%               | 3.86%                     | 73961      | \$31,392.79                                 | 3908                                          | 2425                           |
| Nunavut                    | 1                 | 1                      | 0.57%               | 0.06%                     | 3          | \$63.72                                     | 0                                             | 0                              |
| Ontario                    | 47                | 576                    | 26.70%              | 32.21%                    | 436637     | \$31,865.32                                 | 3942                                          | 3105                           |
| Prince Edward<br>Island    | 2                 | 25                     | 1.14%               | 1.40%                     | 15301      | \$27,888.67                                 | 2984                                          | 2582                           |
| Quebec                     | 18                | 139                    | 10.23%              | 7.77%                     | 158832     | \$30,057.44                                 | 3923                                          | 2675                           |
| Saskatchewan               | 14                | 85                     | 7.95%               | 4.75%                     | 138065     | \$34,795.72                                 | 3613                                          | 3194                           |
| Yukon                      | 1                 | 5                      | 0.57%               | 0.28%                     | 16962      | \$41,664.80                                 | 3278                                          | 2599                           |
| <b>Total</b>               | 176               | 1788                   | 100.00%             | 100.00%                   | 1539908    | \$30,652.31                                 | 2889                                          | 2339                           |

446 Table 6. Number of Campaigns, Population, and Socio-economic Values per Province.

1  
2  
3 447 **Figure Legends**  
4

5 448 **Figure 1: High-Level Description of Conversion Procedure Utilized to add Socio-Economic Data at**  
6 449 **ADA-Level to FSA-Level.** This figure denotes the methodology employed to associate socio-economic  
7 450 data at the ADA-level with the crowdfunding data collected at the FSA-level.  
8

9 451 **Figure 2: Sample Interaction Sequence to Support Adding Context to Campaign Markers in the**  
10 452 **Interactive Web Mapping Tool.** This figure provides a set of sample instructions to users of the CHRP  
11 453 web map to better understand the datasets displayed.  
12

13 454 **Figure 3: Screen Capture of Web Map Application (Main Page).** This figure shows the home page of  
14 455 the CHRP. The data shown in this figure denotes the locations of all crowdfunding campaigns involved  
15 456 with this study. Basic information associated with each of the campaigns can be viewed here.  
17

18 457 **Figure 4: Screen Capture of Web Map Application (with the Exploratory layer of Frequency**  
19 458 **Counts of Campaigns per FSA Displayed).** This figure shows the CHRP displaying one of its  
20 459 exploratory layers. The variable of interest here is number of crowdfunding campaigns per forward  
21 460 sortation area.  
24

25 461 **Figure 5: Screen Capture of Web Map Application (with the Exploratory layer of Income (Median,**  
26 462 **After-Tax, 2015) Displayed).** This figure shows the CHRP displaying one of its exploratory layers. The  
27 463 variable of interest here is income (median, after-tax, 2015). The income data was obtained from the 2016  
28 464 Canadian Census at the ADA-level.  
31

32  
33 465 **Figure 6: Screen Capture of Web Map Application (with Exploratory layer of Education (Number**  
34 466 **of People with a Post-Secondary Education) Displayed).** This figure shows the CHRP displaying one  
35 467 of its exploratory layers. The variable of interest here is education (number of individuals that identify as  
36 468 having post-secondary education). The education data was obtained from the 2016 Canadian Census at  
37 469 the ADA-level.  
40

41  
42  
43 470 **Figure 7: Screen Capture of Web Map Application (with the Exploratory layer of Housing**  
44 471 **(Number of People that own homes) Displayed).** This figure shows the CHRP displaying one of its  
45 472 exploratory layers. The dataset of interest here is housing (number of individuals that own homes). The  
46 473 housing data was obtained from the 2016 Canadian Census at the ADA-level.  
49  
50  
51  
52  
53  
54  
55  
56  
57  
58  
59  
60

```
1
2
3
4
5
6
7 Algorithm GenerateWeights(ADA dataset, FSA dataset)
8 begin
9   a = Number of FSA, b = Number of ADA
10  Initialize relationship matrix of size a rows by b columns
11  For each i ∈ {FSA1...FSAa):
12    Select all from ADA that intersect with FSAi
13    For each j ∈ {intersecting ADA retrieved in selection}:
14      Calculate percent area that ADAj occupies in FSAi
15      Add weight to matrix at the position corresponding with the respective FSA
16      and ADA IDs.
17    Store relationship matrix as CSV for reuse
18  end
```

21  
22  
23 165x74mm (220 x 220 DPI)  
24  
25  
26  
27  
28  
29  
30  
31  
32  
33  
34  
35  
36  
37  
38  
39  
40  
41  
42  
43  
44  
45  
46  
47  
48  
49  
50  
51  
52  
53  
54  
55  
56  
57  
58  
59  
60

The User:

1. Views the "CHRP Explorer" web mapping application
2. Clicks and drags the map to populate the campaign list sidebar
3. Clicks on campaign markers or hovers over sidebar listings to learn more about individual Canadian medical crowdfunding campaigns
4. Uses the basic filters slider to filter campaigns to have at least \$10,000 raised, more than 300 friends, and at least 100 donations
5. Clicks the "Exploratory" tab to change the panel contents
6. Selects "Income" under the "Campaign - Socioeconomic Variable Comparison Layers by Forward sortation area" section
7. Zooms into a geographic area of interest and clicks on a coloured area to view the median income average for that FSA the campaign is associated with

164x63mm (220 x 220 DPI)

1  
2  
3  
4  
5  
6  
7  
8  
9  
10  
11  
12  
13  
14  
15  
16  
17  
18  
19  
20  
21  
22  
23  
24  
25  
26  
27  
28  
29  
30  
31  
32  
33  
34  
35  
36  
37  
38  
39  
40  
41  
42  
43  
44  
45  
46  
47  
48  
49  
50  
51  
52  
53  
54  
55  
56  
57  
58  
59  
60

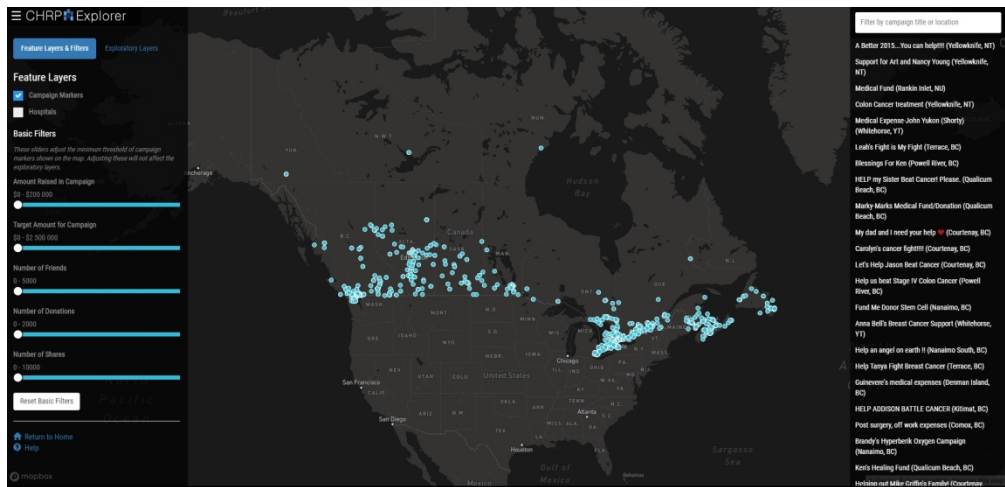

Figure 3

169x81mm (288 x 288 DPI)

1  
2  
3  
4  
5  
6  
7  
8  
9  
10  
11  
12  
13  
14  
15  
16  
17  
18  
19  
20  
21  
22  
23  
24  
25  
26  
27  
28  
29  
30  
31  
32  
33  
34  
35  
36  
37  
38  
39  
40  
41  
42  
43  
44  
45  
46  
47  
48  
49  
50  
51  
52  
53  
54  
55  
56  
57  
58  
59  
60

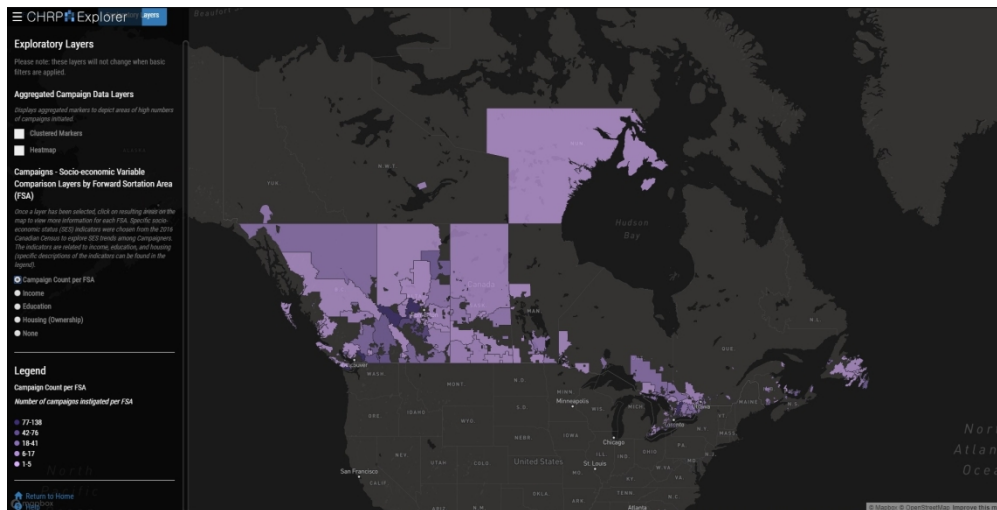

Figure 4

169x85mm (288 x 288 DPI)

1  
2  
3  
4  
5  
6  
7  
8  
9  
10  
11  
12  
13  
14  
15  
16  
17  
18  
19  
20  
21  
22  
23  
24  
25  
26  
27  
28  
29  
30  
31  
32  
33  
34  
35  
36  
37  
38  
39  
40  
41  
42  
43  
44  
45  
46  
47  
48  
49  
50  
51  
52  
53  
54  
55  
56  
57  
58  
59  
60

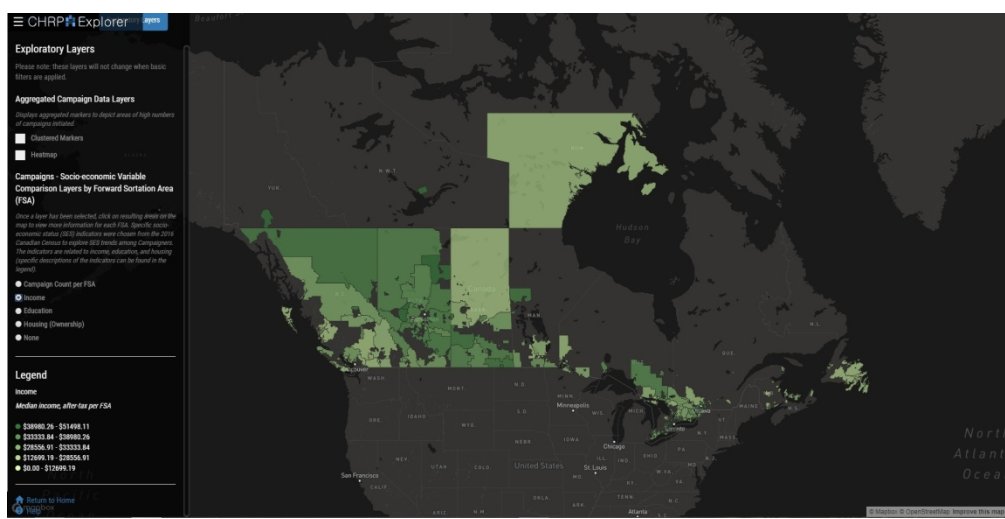

Figure 5

169x85mm (288 x 288 DPI)



1  
2  
3  
4  
5  
6  
7  
8  
9  
10  
11  
12  
13  
14  
15  
16  
17  
18  
19  
20  
21  
22  
23  
24  
25  
26  
27  
28  
29  
30  
31  
32  
33  
34  
35  
36  
37  
38  
39  
40  
41  
42  
43  
44  
45  
46  
47  
48  
49  
50  
51  
52  
53  
54  
55  
56  
57  
58  
59  
60

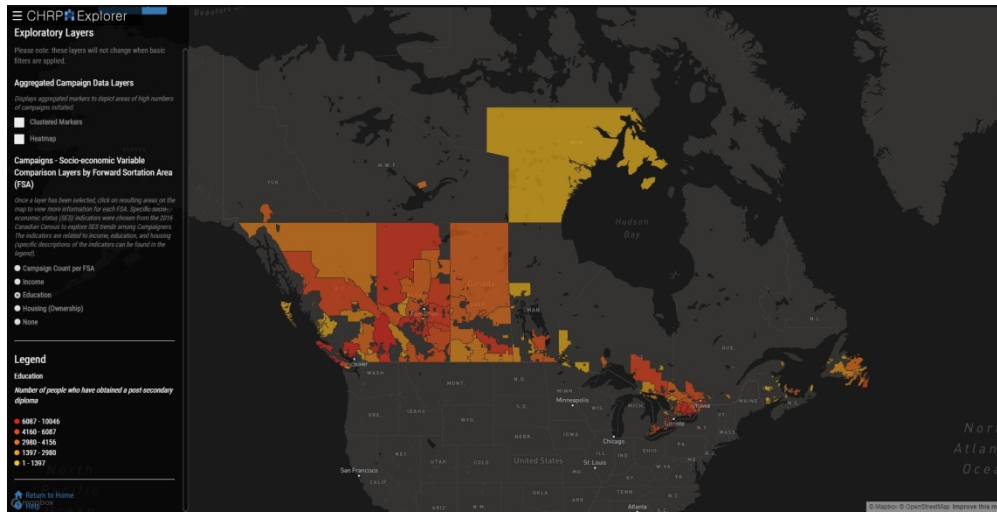

Figure 6

169x85mm (288 x 288 DPI)

1  
2  
3  
4  
5  
6  
7  
8  
9  
10  
11  
12  
13  
14  
15  
16  
17  
18  
19  
20  
21  
22  
23  
24  
25  
26  
27  
28  
29  
30  
31  
32  
33  
34  
35  
36  
37  
38  
39  
40  
41  
42  
43  
44  
45  
46  
47  
48  
49  
50  
51  
52  
53  
54  
55  
56  
57  
58  
59  
60

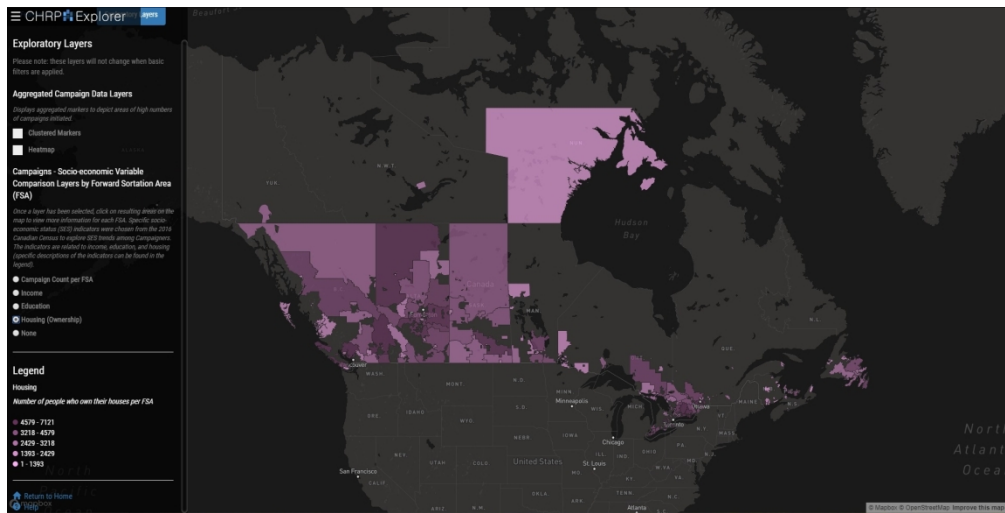

Figure 7

168x85mm (288 x 288 DPI)

## Standards for Reporting Qualitative Research (SRQR)\*

<http://www.equator-network.org/reporting-guidelines/srqr/>

Page/line no(s).

### Title and abstract

|                                                                                                                                                                                                                                                              |      |
|--------------------------------------------------------------------------------------------------------------------------------------------------------------------------------------------------------------------------------------------------------------|------|
| <p><b>Title</b> - Concise description of the nature and topic of the study Identifying the study as qualitative or indicating the approach (e.g., ethnography, grounded theory) or data collection methods (e.g., interview, focus group) is recommended</p> | p. 1 |
| <p><b>Abstract</b> - Summary of key elements of the study using the abstract format of the intended publication; typically includes background, purpose, methods, results, and conclusions</p>                                                               | p. 2 |

### Introduction

|                                                                                                                                                                     |      |
|---------------------------------------------------------------------------------------------------------------------------------------------------------------------|------|
| <p><b>Problem formulation</b> - Description and significance of the problem/phenomenon studied; review of relevant theory and empirical work; problem statement</p> | p. 4 |
| <p><b>Purpose or research question</b> - Purpose of the study and specific objectives or questions</p>                                                              | p. 4 |

### Methods

|                                                                                                                                                                                                                                                                                                                                                                                                             |         |
|-------------------------------------------------------------------------------------------------------------------------------------------------------------------------------------------------------------------------------------------------------------------------------------------------------------------------------------------------------------------------------------------------------------|---------|
| <p><b>Qualitative approach and research paradigm</b> - Qualitative approach (e.g., ethnography, grounded theory, case study, phenomenology, narrative research) and guiding theory if appropriate; identifying the research paradigm (e.g., postpositivist, constructivist/ interpretivist) is also recommended; rationale**</p>                                                                            | pp. 5-7 |
| <p><b>Researcher characteristics and reflexivity</b> - Researchers' characteristics that may influence the research, including personal attributes, qualifications/experience, relationship with participants, assumptions, and/or presuppositions; potential or actual interaction between researchers' characteristics and the research questions, approach, methods, results, and/or transferability</p> | N/A     |
| <p><b>Context</b> - Setting/site and salient contextual factors; rationale**</p>                                                                                                                                                                                                                                                                                                                            | pp. 5-7 |
| <p><b>Sampling strategy</b> - How and why research participants, documents, or events were selected; criteria for deciding when no further sampling was necessary (e.g., sampling saturation); rationale**</p>                                                                                                                                                                                              | pp. 5-7 |
| <p><b>Ethical issues pertaining to human subjects</b> - Documentation of approval by an appropriate ethics review board and participant consent, or explanation for lack thereof; other confidentiality and data security issues</p>                                                                                                                                                                        | N/A     |
| <p><b>Data collection methods</b> - Types of data collected; details of data collection procedures including (as appropriate) start and stop dates of data collection and analysis, iterative process, triangulation of sources/methods, and modification of procedures in response to evolving study findings; rationale**</p>                                                                             | pp. 5-7 |

|    |                                                                                         |         |
|----|-----------------------------------------------------------------------------------------|---------|
| 1  |                                                                                         |         |
| 2  |                                                                                         |         |
| 3  | <b>Data collection instruments and technologies</b> - Description of instruments (e.g., |         |
| 4  | interview guides, questionnaires) and devices (e.g., audio recorders) used for data     |         |
| 5  | collection; if/how the instrument(s) changed over the course of the study               | pp. 5-7 |
| 6  |                                                                                         |         |
| 7  | <b>Units of study</b> - Number and relevant characteristics of participants, documents, |         |
| 8  | or events included in the study; level of participation (could be reported in results)  | pp. 5-7 |
| 9  |                                                                                         |         |
| 10 | <b>Data processing</b> - Methods for processing data prior to and during analysis,      |         |
| 11 | including transcription, data entry, data management and security, verification of      |         |
| 12 | data integrity, data coding, and anonymization/de-identification of excerpts            | Pp. 5-7 |
| 13 |                                                                                         |         |
| 14 | <b>Data analysis</b> - Process by which inferences, themes, etc., were identified and   |         |
| 15 | developed, including the researchers involved in data analysis; usually references a    |         |
| 16 | specific paradigm or approach; rationale**                                              | Pp. 5-7 |
| 17 |                                                                                         |         |
| 18 | <b>Techniques to enhance trustworthiness</b> - Techniques to enhance trustworthiness    |         |
| 19 | and credibility of data analysis (e.g., member checking, audit trail, triangulation);   |         |
| 20 | rationale**                                                                             | Pp. 5-7 |

## Results/findings

|    |                                                                                             |         |
|----|---------------------------------------------------------------------------------------------|---------|
| 23 | <b>Synthesis and interpretation</b> - Main findings (e.g., interpretations, inferences, and |         |
| 24 | themes); might include development of a theory or model, or integration with                |         |
| 25 | prior research or theory                                                                    | pp. 7-9 |
| 26 |                                                                                             |         |
| 27 | <b>Links to empirical data</b> - Evidence (e.g., quotes, field notes, text excerpts,        |         |
| 28 | photographs) to substantiate analytic findings                                              | pp. 7-9 |

## Discussion

|    |                                                                                           |           |
|----|-------------------------------------------------------------------------------------------|-----------|
| 32 | <b>Integration with prior work, implications, transferability, and contribution(s) to</b> |           |
| 33 | <b>the field</b> - Short summary of main findings; explanation of how findings and        |           |
| 34 | conclusions connect to, support, elaborate on, or challenge conclusions of earlier        |           |
| 35 | scholarship; discussion of scope of application/generalizability; identification of       |           |
| 36 | unique contribution(s) to scholarship in a discipline or field                            | pp. 9-10  |
| 37 |                                                                                           |           |
| 38 | <b>Limitations</b> - Trustworthiness and limitations of findings                          | pp. 10-11 |

## Other

|    |                                                                                            |       |
|----|--------------------------------------------------------------------------------------------|-------|
| 42 | <b>Conflicts of interest</b> - Potential sources of influence or perceived influence on    |       |
| 43 | study conduct and conclusions; how these were managed                                      | p. 12 |
| 44 |                                                                                            |       |
| 45 | <b>Funding</b> - Sources of funding and other support; role of funders in data collection, |       |
| 46 | interpretation, and reporting                                                              | p. 13 |

\*The authors created the SRQR by searching the literature to identify guidelines, reporting standards, and critical appraisal criteria for qualitative research; reviewing the reference lists of retrieved sources; and contacting experts to gain feedback. The SRQR aims to improve the transparency of all aspects of qualitative research by providing clear standards for reporting qualitative research.

1  
2  
3  
4  
5  
6  
7  
8  
9  
10  
11  
12  
13  
14  
15  
16  
17  
18  
19  
20  
21  
22  
23  
24  
25  
26  
27  
28  
29  
30  
31  
32  
33  
34  
35  
36  
37  
38  
39  
40  
41  
42  
43  
44  
45  
46  
47  
48  
49  
50  
51  
52  
53  
54  
55  
56  
57  
58  
59  
60

\*\*The rationale should briefly discuss the justification for choosing that theory, approach, method, or technique rather than other options available, the assumptions and limitations implicit in those choices, and how those choices influence study conclusions and transferability. As appropriate, the rationale for several items might be discussed together.

**Reference:**

O'Brien BC, Harris IB, Beckman TJ, Reed DA, Cook DA. **Standards for reporting qualitative research: a synthesis of recommendations.** *Academic Medicine*, Vol. 89, No. 9 / Sept 2014  
DOI: 10.1097/ACM.0000000000000388

For peer review only

# BMJ Open

## Spatially Exploring the Intersection of Socio-Economic Status and Canadian Cancer-Related Medical Crowdfunding Campaigns

|                                 |                                                                                                                                                                                                                                                                                                                       |
|---------------------------------|-----------------------------------------------------------------------------------------------------------------------------------------------------------------------------------------------------------------------------------------------------------------------------------------------------------------------|
| Journal:                        | <i>BMJ Open</i>                                                                                                                                                                                                                                                                                                       |
| Manuscript ID                   | bmjopen-2018-026365.R2                                                                                                                                                                                                                                                                                                |
| Article Type:                   | Research                                                                                                                                                                                                                                                                                                              |
| Date Submitted by the Author:   | 17-May-2019                                                                                                                                                                                                                                                                                                           |
| Complete List of Authors:       | van Duynhoven , Alysha; Simon Fraser University<br>Lee, Anthony; Simon Fraser University<br>Michel , Ross; Simon Fraser University<br>Snyder, Jeremy; Simon Fraser University<br>Crooks, Valorie; Simon Fraser University<br>Chow-White, Peter; Simon Fraser University<br>Schuurman, Nadine; Simon Fraser University |
| <b>Primary Subject Heading</b>: | Health services research                                                                                                                                                                                                                                                                                              |
| Secondary Subject Heading:      | Ethics, Health policy                                                                                                                                                                                                                                                                                                 |
| Keywords:                       | Crowdfunding, Equity, Spatial Analysis                                                                                                                                                                                                                                                                                |
|                                 |                                                                                                                                                                                                                                                                                                                       |

SCHOLARONE™  
Manuscripts

1  
2  
3 1 **Spatially Exploring the Intersection of Socio-Economic Status and Canadian Cancer-Related**  
4  
5 2 **Medical Crowdfunding Campaigns**  
6  
7  
8 3  
9

10 4 Alysha van Duynhoven (Department of Geography, Simon Fraser University, Burnaby BC Canada)

11 5 Anthony Lee (Department of Geography, Simon Fraser University, Burnaby BC Canada)

12 6 Ross Michel (Department of Geography, Simon Fraser University, Burnaby BC Canada)

13  
14 7  
15  
16 8 Jeremy Snyder (Faculty of Health Sciences, Simon Fraser University)

17  
18 9 8888 University Drive; Blusson Hall 10516; Burnaby BC V5A 1S6 Canada; [jcs12@sfu.ca](mailto:jcs12@sfu.ca); 778-782-3258

19  
20 10  
21  
22 11 Valorie A. Crooks (Department of Geography, Simon Fraser University, Burnaby BC Canada)

23 12 Peter Chow-White (School of Communication, Simon Fraser University, Burnaby BC Canada)

24 13 Nadine Schuurman (Department of Geography, Simon Fraser University, Burnaby BC Canada)

25  
26 14  
27 15 Keywords: Crowdfunding; Equity; Cancer; Spatial Analysis

28  
29 16 Word Count: 3622  
30  
31  
32  
33  
34  
35  
36  
37  
38  
39  
40  
41  
42  
43  
44  
45  
46  
47  
48  
49  
50  
51  
52  
53  
54  
55  
56  
57  
58  
59  
60

## 29 Abstract

30 **Objectives:** Medical crowdfunding is a rapidly growing practice where individuals leverage social  
31 networks to raise money for health-related needs. This practice has allowed many to access health care  
32 and avoid medical debt but has also raised a number of ethical concerns. A dominant criticism of this  
33 practice is that it is likely to increase inequities in access to healthcare if persons from relatively wealthy  
34 backgrounds, media connections, tech savvy, and educational attainments are best positioned to use and  
35 succeed with crowdfunding. However, limited data has been published to support this claim. Our  
36 objective in this paper is to assess this concern using socio-economic data and information from  
37 crowdfunding campaigns.

38 **Setting:** To assess this concern, we present an exploratory spatial analysis of a new dataset of  
39 crowdfunding campaigns for cancer-related care by Canadian residents.

40 **Participants:** Four datasets were used: 1) a medical crowdfunding dataset that included cancer-related  
41 campaigns posted by Canadians; 2) 2016 Census Profile for aggregate dissemination areas; 3) aggregate  
42 dissemination area boundaries; and 4) forward sortation area boundaries.

43 **Results:** Our exploratory spatial analysis demonstrates that use of crowdfunding for cancer-related needs  
44 in Canada corresponds with high income, home ownership, and high educational attainment. Campaigns  
45 were also commonly located near city centres.

46 **Conclusions:** These findings support concerns that those in positions of relative socio-economic privilege  
47 disproportionately utilize crowdfunding to address health-related needs. This study was not able to  
48 determine whether other socio-economic dimensions such as race, gender, ethnicity, nationality, and  
49 linguistic fluency are also correlated with use of medical crowdfunding. Thus, we call for further research  
50 to explore the relationship between socio-economic variables and medical crowdfunding campaigning to  
51 explore these other socio-economic variables and campaigns for needs unrelated to cancer.

## 53 Strengths and Limitations of this Study

54 Developed large dataset of crowdfunding data

55 Presents methods for analyzing datasets of crowdfunding campaign information

56 Links data on crowdfunding campaigns to data on income, home ownership, and education levels

57 Unable to determine whether race, gender, ethnicity, nationality, or linguistic fluency impact use of  
58 crowdfunding

59

60

61

62

63

64



## 65 Introduction

66 Individuals and groups have increasingly turned to online social networking and social media  
67 platforms to fundraise. This practice has come to be popularly known as crowdfunding. In  
68 particular, charitable crowdfunding, as opposed to entrepreneurial fundraising intended to raise  
69 money for businesses, has developed as a means for individuals or small groups to finance their  
70 personal needs. These platforms host campaigns, including text, images, and video, facilitate  
71 outreach to potential donors via social media, and process donations.

72 The crowdfunding platform GoFundMe dominates the charitable crowdfunding sector.  
73 Before it recently acquired YouCaring, the second largest social crowdfunding platform, it  
74 controlled 90% of the charitable crowdfunding business in the United States (US) and 80%  
75 globally [1,2]. Launched in 2010, US\$ 5 billion has been raised via GoFundMe to date and this  
76 platform supports a community consisting of more than 50 million donors and users [1].  
77 Campaigns for health-related purposes comprise the largest proportion of fundraisers hosted by  
78 GoFundMe [2,3]. These medical crowdfunding campaigns are thought to be used to pay for  
79 essential services for those lacking comprehensive medical insurance, elective procedures not  
80 covered by insurance, and unproven or experimental medical treatments. They are also used to  
81 pay for indirect needs related to receiving medical care, including travel to receive care,  
82 compensation for time off from work, and payments for medical equipment [3]. The use of  
83 crowdfunding platforms for medical purposes is expected to continue to grow and thus have a  
84 substantial impact on how individuals access health-related care [3,4].

85 Successful medical crowdfunders can benefit greatly from being better able to obtain  
86 health-related support via crowdfunding. However, this practice has also been the target of  
87 considerable criticism. These concerns include worries about fraudulent campaigns, loss of

1  
2  
3 88 medical privacy, and encouraging the privatization of healthcare [3,4]. Arguably the most  
4  
5 89 common and serious critique of medical crowdfunding is that it will exacerbate existing  
6  
7 90 inequities in who is ultimately able to (financially) access health care. While differential access  
8  
9 91 to health care is shaped by each community's health and social care system, insurance coverage,  
10  
11 92 and demographics, in general those in positions of socio-economic privilege, even in universal  
12  
13 93 health systems, have relatively better access to health-related care than their less privileged  
14  
15 94 compatriots. Medical crowdfunding could exacerbate this problem, it is argued, if crowdfunding  
16  
17 95 serves to reward recipients according to their popularity, extent of social networks, technological  
18  
19 96 capabilities, or media savvy rather than need [5]. For example, Young and Scheinberg [4 p.  
20  
21 97 1623] flag the "potential for unfairly advantaging those with the means to engage with online  
22  
23 98 tools and tap into large social networks, which may lead to an underrepresentation of cases with  
24  
25 99 the greatest need in which patients lack the tools to coordinate effective crowdfunding  
26  
27 100 campaigns." Similarly, critics express that medical crowdfunding is likely to reinforce existing  
28  
29 101 inequalities in class and power [6] and reward those with social connections to wealthy persons,  
30  
31 102 media connections, and the educational attainments needed to communicate effectively online  
32  
33 103 [7]. Others note that placing the distribution of medical funds in the hands of private  
34  
35 104 crowdfunding platforms has problematic effects, as when these companies prohibit fundraisers  
36  
37 105 for certain services and procedures such as abortion or promote and donate to specific  
38  
39 106 fundraisers (as in the case of the parents of Charlie Gard fundraising for an unproven medical  
40  
41 107 treatment) [8,9,10].  
42  
43  
44  
45  
46  
47  
48

49 108 Empirical support for the criticism that medical crowdfunding mostly benefits those who  
50  
51 109 are socio-economically advantaged is thus far limited. Lukk, Schneiderhan, and Soares reviewed  
52  
53 110 319 crowdfunding campaigns by Canadians for services related to education and healthcare [11].  
54  
55  
56  
57  
58  
59  
60

1  
2  
3 111 They found that older and visible minority Canadians were relatively less successful in these  
4  
5 112 campaigns. Berliner and Kenworthy examined 200 medical crowdfunding campaigns and found  
6  
7 113 correlations between success in meeting medical crowdfunding goals and the inclusion of photos  
8  
9 114 and videos, campaign updates, and interactions including comments, social media shares, and  
10  
11 115 ‘liking’ a campaign [12]. A review of 850 campaigns for services related to organ transplantation  
12  
13 116 found that campaigns with positive emotional sentiment tend to be relatively successful [13]. An  
14  
15 117 analysis of 410 crowdfunding campaigns for medical transition and gender affirming surgeries  
16  
17 118 and treatments demonstrated that campaigners that are young, are white, and transgender men  
18  
19 119 raise more than others in this area but that campaigns for medical transition perform less well  
20  
21  
22 120 than medical crowdfunding campaigns generally [14].  
23  
24  
25

26 121 Here we present an exploratory analysis of a new dataset of crowdfunding campaigns for  
27  
28 122 cancer-related care by Canadian residents that is connected to a selection of demographic  
29  
30 123 information from the 2016 Canadian Census to explore the relationship between campaign use  
31  
32 124 and socio-economic status. We captured this medical crowdfunding dataset using an automated  
33  
34 125 data crawling program and machine learning techniques. We specifically examine crowdfunding  
35  
36 126 campaigns for cancer-related care as existing research has already documented the commonality  
37  
38 127 of such campaigns in Canada [15,16,17], and we contrast these campaigns against geo-  
39  
40 128 demographic trends using an exploratory spatial data analysis (ESDA) approach. ESDA  
41  
42 129 facilitates the investigation of prior assumptions and guides the identification of spatial patterns  
43  
44 130 [18,19]. We use these patterns to raise important new research questions about medical  
45  
46 131 crowdfunding in the discussion.  
47  
48  
49  
50  
51

## 52 132 **Materials and Methods**

53  
54  
55  
56  
57  
58  
59  
60

1  
2  
3 133 We utilized four datasets in this exploratory analysis: 1) a medical crowdfunding dataset that  
4  
5 134 included cancer-related campaigns posted by Canadians; 2) the 2016 Census Profile for  
6  
7 135 aggregate dissemination areas; 3) aggregate dissemination area boundaries; and 4) forward  
8  
9 136 sortation area boundaries. In consultation with the Simon Fraser University Research Ethics  
10  
11 137 Board we determined that ethics approval was not required for this project under the locally  
12  
13 138 relevant Tri-Council policy (article 2.2) as the data being collected and used was publicly  
14  
15 139 accessible with no reasonable expectation of privacy given the nature of crowdfunding as an  
16  
17 140 activity [20]. While not required by local research ethics regulations, we have chosen not to  
18  
19 141 publish any identifiable details from the scraped campaigns in the interest of the privacy of  
20  
21 142 campaign recipients.

22  
23  
24  
25  
26 143 We compiled a medical crowdfunding dataset by creating an automated web crawling  
27  
28 144 algorithm. To do this we developed a Python based automated web crawler that scraped the  
29  
30 145 GoFundMe platform looking for key words or strings of words – in this case, the keyword  
31  
32 146 ‘cancer’ – and postal codes identifying campaigns as originating within Canada. We chose the  
33  
34 147 key term ‘cancer’ as it is a higher order concept that captures many subtypes. Furthermore, it is a  
35  
36 148 term that will be more familiar and more likely to be used by crowdfunders and donors than  
37  
38 149 subtype names. Our goal was to capture a large selection of cancer-related campaigns rather than  
39  
40 150 an exhaustive sample of such campaigns, making the higher order term well suited to our aims.

41  
42  
43  
44  
45 151 The search took place on June 11, 2016. Any ambiguous posts were read by the  
46  
47 152 researchers to determine if they fit the classification and should be included. After relevant  
48  
49 153 campaigns were identified, we used a SQL database server to store the site in HTML form for  
50  
51 154 further analysis. Once the full HTML files from each campaign were retrieved, the pages were  
52  
53  
54 155 then parsed to remove HTML tags. Further cleaning and labeling took place using a machine

1  
2  
3 156 learning algorithm designed to find and include any missing information or attributes of the  
4  
5 157 campaigns related to cancer. Through this process, campaigns not listed in the ‘medical’  
6  
7  
8 158 category were excluded and the main campaign content attributes were extracted and irrelevant  
9  
10 159 content (e.g., footers) were removed. The final records were stored in a Redis database for access  
11  
12 160 by simple query for analysis. The dataset used in this study contains 1788 records from May  
13  
14  
15 161 2012 to June 2016 pertaining to cancer-related campaigns created by Canadians.

16  
17 162 Aggregate dissemination areas (ADAs) are a new census product released by Statistics  
18  
19 163 Canada as part of the 2016 Canadian Census. Delineation of ADAs considers boundaries of  
20  
21 164 previous census products, including existing census divisions, census metropolitan areas, and  
22  
23 165 census tracts [21]. Forward sortation areas (FSAs) are administrative boundaries determined by  
24  
25 166 Canada Post [22]. They are alphanumerically represented by “the first three characters in a  
26  
27 167 Canadian postal code” [22]. The records contained in our crowdfunding dataset described above  
28  
29 168 have an FSA attribute. This geographic data unit enables ESDA. Boundaries of ADAs and FSAs  
30  
31 169 were obtained from Statistics Canada [23].  
32  
33  
34  
35

36 170 Socio-economic status and its correlation with an individual's health or ability to obtain  
37  
38 171 treatments have been previously assessed at a FSA level [24,25,26], which is why we opted to  
39  
40 172 explore socio-economic status indicators. Variables related to income, education, and housing  
41  
42 173 were chosen and obtained using the University of Toronto’s Canadian Census Analyser at the  
43  
44 174 ADA level (see Table 1 for exact variables obtained) [27]. Further data pre-processing and  
45  
46 175 transformations were required in order to link socio-economic data to FSAs due to current data  
47  
48 176 limitations.  
49  
50  
51

52 177

53  
54 178 \*\* insert Table 1 here \*\*  
55  
56  
57

1  
2  
3 179  
4  
5  
6 180 Profile and boundary datasets for FSAs are unavailable for the Statistics Canada 2016  
7  
8 181 Census data. In lieu of the FSAs, we computed the weighted average of socio-economic  
9  
10 182 variables based on the percent of spatial overlap between ADAs and FSAs. To prepare for this  
11  
12 183 conversion, ADAs were spatially joined with data retrieved from the 2016 Census Profile. Each  
13  
14 184 FSA is also joined with respective campaign frequencies (see Figure 1 for the high-level  
15  
16 185 description of conversion procedure utilized to add socio-economic data at ADA-level to FSA-  
17  
18 186 level). Once the relationship matrix was generated from the function GenerateWeights, it was  
19  
20 187 then retrieved and used to calculate weighted averages of socio-economic variables contained in  
21  
22 188 each intersecting ADA. These weighted socio-economic variables were appended to each  
23  
24 189 respective FSA.  
25  
26  
27  
28

29 190 \*\* insert Figure 1 here \*\*  
30  
31  
32 191  
33

34 192 Using ArcMap from the ArcGIS suite (version 10.5), quintiles were created using natural  
35  
36 193 breaks. The data were categorized as quintiles as we trusted that five classes would be sufficient  
37  
38 194 to showcase meaningful differences while minimizing complexity of visual results. These  
39  
40 195 quintiles were used in cartographic representations to support ESDA tasks. Visual comparisons  
41  
42 196 at regional and provincial levels were then conducted with regards to income, education, and  
43  
44 197 housing ownership. The creation of these quintiles allowed project correspondents to examine  
45  
46 198 the data for geographic trends. These cartographic products enabled the significance of these  
47  
48 199 socio-economic variables to be gauged for medical crowdfunding.  
49  
50  
51

52  
53 200 Campaigns for each FSA were counted, and these frequencies were assigned to their  
54  
55 201 respective boundaries. These FSAs were subsequently linked with ADAs that feature census  
56  
57  
58  
59  
60

1  
2  
3 202 variables from the 2016 Canadian Census. These variables consisted of income, number of  
4  
5 203 persons who have completed post-secondary education, and home ownership. These linkages  
6  
7 204 were informed by research conducted by Rogers [28] in which these variables were shown to be  
8  
9 205 commonly associated with vulnerability with regard to health and healthcare. To link these  
10  
11 206 datasets, the variables were weighted based on the percent of areal overlap each ADA shares  
12  
13 207 with each FSA. The resulting weighted attributes were then divided into quintiles using a method  
14  
15 208 similar to Sothorn et al. [29]. Resulting quintiles were then visualized in an interactive  
16  
17 209 cartographic display, or web map, enabling geographic comparisons to be made. This map can  
18  
19 210 be viewed at: <https://www.crowdfundingforhealth.org/chrpexplorer>. Figure 2 describes the  
20  
21 211 process for users of CHRP to explore the ESDA results. Figure 3 shows an image of the web  
22  
23 212 map interface.

24  
25  
26  
27  
28 213 \*\* insert Figure 2 here \*\*  
29  
30

31 214  
32  
33 215 \*\* insert Figure 3 here \*\*  
34  
35  
36  
37

### 38 217 *Patient and Public Involvement*

39  
40 218 As the information analyzed in this study was publicly available, patients were not recruited for  
41  
42 219 or actively involved in this study. Patients and the public were not involved in the design or  
43  
44 220 planning of the study.  
45  
46

### 47 221 48 49 222 **Results** 50 51 52 53 54 55 56 57

1  
2  
3 223 Our exploratory analysis utilizes socio-economic variables that have been linked with FSAs.  
4

5 224 These include a layer of campaign counts per FSA, income, education, and housing (see Figures  
6  
7 225 4, 5, 6, & 7 for screen captures).  
8

9  
10 226 \*\* insert Figure 4 here \*\*  
11

12 227 \*\* insert Figure 5 here \*\*  
13

14 228 \*\* insert Figure 6 here \*\*  
15

16  
17 229 \*\* insert Figure 7 here \*\*  
18

19 230  
20

21 231 In addition to the web map, a table was generated that showed the proportion of crowdfunding  
22  
23 232 campaigns that belong in each quintile for each socio-economic variable (see Tables 2, 3, 4, &  
24  
25 233 5).  
26  
27  
28

29 234

30  
31 235 \*\* insert Table 2 here \*\*  
32

33 236 \*\* insert Table 3 here \*\*  
34

35 237 \*\* insert Table 4 here \*\*  
36

37 238 \*\* insert Table 5 here \*\*  
38  
39

40 239

41  
42 240 It is important to note that only 176 FSAs out of the 1620 FSAs in Canada contained at least one  
43  
44 241 crowdfunding campaign, with the population of these FSAs representing approximately 5% of  
45  
46 242 the national total. A separate table shows the distribution of the crowdfunding campaigns  
47  
48 243 between each Canadian province and territory and the average value of each socio-economic  
49  
50 244 variable within each administrative division (see Table 6).  
51  
52

53  
54 245  
55  
56  
57  
58  
59  
60



246 \*\* insert Table 6 here \*\*

247  
248 The average income of crowdfunding campaigners in this dataset is within middle to high  
249 level FSAs, with 65.49% of campaigns located in FSAs within the three highest quintiles in the  
250 income category (see Table 3). These higher income levels are matched by higher rates of home  
251 ownership among these campaigners, with housing ownership values being larger in the middle  
252 quintile (see Table 5). This group also tends to be well educated, with education values tending  
253 toward the higher quintiles (see Table 4).

254 Collectively, our ESDA shows that use of cancer-related medical crowdfunding is  
255 occurring unevenly across the country relative to population distribution. For example,  
256 Canadians' cancer-related crowdfunding campaigns were also commonly located near city  
257 centres (see Figure 3). Provincial differences in campaign use also exist. Campaigns were more  
258 commonly posted in the provinces of Ontario and British Columbia and less so in the Atlantic  
259 provinces. There is a noticeable density of campaigns in the prairie provinces of Alberta and  
260 Saskatchewan.

## 262 Discussion

263 Our ESDA-based findings support existing concerns that persons in positions of relative socio-  
264 economic privilege disproportionately utilize crowdfunding to address health-related needs – in  
265 this case care related to cancer. Individuals in the highest income FSAs were found to be the  
266 heaviest users of medical crowdfunding for cancer-related campaigns, as were individuals in  
267 FSAs with high rates of home ownership. These ESDA-based interpretations support the idea  
268 that wealthier individuals are more likely to see crowdfunding as a way to draw together

1  
2  
3 269 financial resources from elsewhere to meet their health needs. We also observed that individuals  
4  
5 270 in FSAs with higher rates of education turned more frequently to medical crowdfunding. This  
6  
7 271 ESDA-based interpretation supports existing claims that individuals who are better educated,  
8  
9 272 more familiar with online technologies, and better able to express themselves online are more  
10  
11 273 likely to take advantage of crowdfunding to address health-related needs. The positive  
12  
13 274 correlation between the amount raised in a campaign and number of times the campaign was  
14  
15 275 shared supports the speculation that social capital and tech-savviness are important constituents  
16  
17 276 of crowdfunding campaign success.

18  
19  
20  
21 277 Our exploration of geo-demographic trends regarding Canadians' use of cancer-related  
22  
23 278 crowdfunding shows that this is a highly urban phenomenon. This is somewhat counterintuitive  
24  
25 279 considering the extensive health service gaps in rural Canadian communities that drive some  
26  
27 280 residents to consider alternative ways to access necessary care [30], such as crowdfunding for the  
28  
29 281 costs of private treatment or to relocate to an urban centre. Research regarding a potential urban-  
30  
31 282 rural divide in crowdfunding use is very limited and so it is difficult to know why there can be  
32  
33 283 proportionately less use in rural areas. This may be due to limited access to technology or lower  
34  
35 284 levels of education in rural Canadian communities [31,32]. Alternatively, it may be due to strong  
36  
37 285 voluntary and informal care sectors in 'tight-knit' rural communities that would lead to residents  
38  
39 286 pulling together to support those in need [30,33], which would lessen the need for drawing on  
40  
41 287 disparate social networks via crowdfunding. It is important to note, however, that our ESDA  
42  
43 288 approach means that we cannot conclusively state that our analysis documents a clear urban-rural  
44  
45 289 divide. This is due in part to the large aggregations of FSAs as well as the sparse population of  
46  
47 290 Nunavut that can both over- and under-estimate socio-economic variables. We thus flag this as  
48  
49 291 an important issue for future medical crowdfunding research. Furthermore, factors distinctive to  
50  
51  
52  
53  
54  
55  
56  
57  
58  
59  
60

1  
2  
3 292 the Canadian cultural, geographic, and healthcare context may mean that these specific results  
4  
5 293 are not applicable elsewhere. These factors include widespread access to basic cancer care  
6  
7  
8 294 through the Canadian single payer health system, cultural differences in charitable giving, and  
9  
10 295 the geographically disparate nature of Canadian communities. These differences may be less  
11  
12 296 acute in European communities with greater access to public health insurance and greater in the  
13  
14 297 US and other countries with more limited public provision of care but requires additional  
15  
16 298 investigation in other settings.

19 299 While our interpretations of the ESDA results support the general concern that medical  
20  
21 300 crowdfunding will tend to exacerbate socio-economic inequities in access to health-related care,  
22  
23 301 only certain dimensions of this critique were explored here. For example, while we found  
24  
25 302 positive correlations between cancer-related crowdfunding and wealth and education levels, we  
26  
27 303 were not able to explore whether other dimensions of socio-economic privilege are positively  
28  
29 304 correlated. These dimensions include race, gender, ethnicity, nationality, and linguistic fluency,  
30  
31 305 all of which are factors that lead to inequities in health status [34,35]. This leads us to make three  
32  
33 306 important points. First, we acknowledge that it is possible that only certain dimensions of socio-  
34  
35 307 economic privilege correlate with using crowdfunding to address health-related needs, and that  
36  
37 308 some or all of those not explored here do not shape medical crowdfunding use in the ways  
38  
39 309 documented here. Second, and because of this, it is important to explicitly state that this  
40  
41 310 exploratory analysis supports the hypothesis of a more general correlation but does not provide  
42  
43 311 direct evidence supporting every dimension of this correlation. And third, we call for further  
44  
45 312 research to explore the relationship between socio-economic variables and medical  
46  
47 313 crowdfunding use in general or for cancer-related campaigns in order to assist with developing a  
48  
49 314 more robust understanding of any interrelationships.  
50  
51  
52  
53  
54  
55  
56  
57  
58  
59  
60

1  
2  
3 315 *Limitations*  
4

5 316 Only the first three digits of postal codes were included in the dataset of crowdfunding  
6  
7 317 campaigns, which were then linked to FSAs. FSAs are smaller in urban areas and may be  
8  
9 318 geographically vast in rural areas. Linking ADAs to FSAs could result in broad generalizations  
10  
11 319 and aggregation errors and lead to ecological fallacies. This implies that findings from our study  
12  
13 320 are limited, as only broad claims can be stated. The aforementioned generalizations could be less  
14  
15 321 impacted in urban areas with smaller FSAs comparatively to rural areas. While this has  
16  
17 322 implications for our results, the impact may be reduced considering that as of 2011, over 80% of  
18  
19 323 Canada's population lives in urban environments [36].  
20  
21  
22  
23

24 324 We acknowledge that a medical crowdfunding campaign recipient may be different from  
25  
26 325 campaign's creator. This necessitates further research with regard to the issues explored in this  
27  
28 326 analysis because campaigners may reside in or report different FSAs than the individual or  
29  
30 327 family in need of financial assistance. Further to this, postal codes are self-reported by campaign  
31  
32 328 creators, which allows mistakes to be made. Nothing can be done to address this as a limitation  
33  
34 329 beyond acknowledging our awareness of the potential for errors to exist in postal code reporting.  
35  
36 330 Campaigners may also have moved to an urban centre in order to access care, thus introducing  
37  
38 331 an urban bias into our sample.  
39  
40  
41  
42

43 332 FSAs encoded in the campaign entries dictated the primary level of aggregation for our  
44  
45 333 study, thus necessitating us to limit selection of socio-economic variables. If spatial and non-  
46  
47 334 spatial attributes were improved, more socio-economic status variables could be involved, such  
48  
49 335 as sex or immigration status. This would aid in obtaining more robust results. Another limitation  
50  
51 336 encountered was the fact that the census profiles at the FSA-level were unavailable due to  
52  
53  
54  
55  
56  
57  
58  
59  
60

1  
2  
3 337 accuracy issues (Statistics Canada, 2018) [37]. To substitute, a methodology to link and weight  
4  
5 338 the chosen socio-economic variables from the ADA-level to FSA-level had to be developed.  
6  
7

8 339 At the time this analysis was conducted, the Census profile for the FSA level was not  
9  
10 340 published. To handle this, we selected the SES variables from the ADA level. Performing an  
11  
12 341 intersection operation between FSAs and ADAs, SES variables were added to FSAs based on the  
13  
14 342 percentage of area shared. By taking the weighted average of SES variables from the ADAs that  
15  
16 343 intersect with each FSA, values such as those for shown for Nunavut are impacted by the error  
17  
18 344 accumulation from this procedure, where populations are sparse. Likewise, if there were any  
19  
20 345 issues with values in the ADA-level SES data, these will propagate to the weighted SES  
21  
22 346 variables linked to the FSAs. This means that data issues from the ADA Census profile  
23  
24 347 product or low populations contribute to and exacerbate errors. The Nunavut values are correct  
25  
26 348 with respect to this method applied. This is a systematic limitation that is exaggerated by the  
27  
28 349 sparse population of Nunavut and affects all data reported in the tables at varying degrees.  
29  
30  
31  
32  
33

34 350 As our dataset was acquired for a snapshot in time, we acknowledge that campaigns have  
35  
36 351 been instantiated at different times and have been underway for varying durations. These  
37  
38 352 comparisons may impact results because the campaign duration captured in the current dataset  
39  
40 353 may not be representative of the overall success of the campaign. For example, less successful  
41  
42 354 campaigns may be deleted more quickly than more successful campaigns, more successful  
43  
44 355 campaigns may not be removed at all, or less technologically adept individuals may not think to  
45  
46 356 delete completed campaigns. Future work may look to compare individual campaigns that have  
47  
48 357 either been run for the same length of time or have completed their respective lifecycles on major  
49  
50 358 crowdfunding platforms.  
51  
52  
53  
54  
55

56 359

## 360 **Conclusions**

361 The findings reported here support concerns that charitable crowdfunding will tend to advantage  
362 relatively socio-economically privileged individuals. While supporters of medical crowdfunding  
363 point to its potential to help people access necessary health care and avoid debt or even medical  
364 bankruptcy, this paper demonstrates that this potential is not distributed equitably across society.  
365 While medical crowdfunding still benefits many, these findings show its limits in serving as a  
366 systematic and fair solution to structural deficiencies in health systems. Additional research,  
367 including using the methods described here, would help to demonstrate whether these findings  
368 are reproduced for other socio-economic factors, in countries other than Canada, and for health  
369 needs beyond cancer.

370

## 371 **Contributorship Statement**

372 AvD, AL, and RM contributed to developing the methods, conducting the analysis, and writing  
373 the manuscript. JS and VAC contributed to method design, securing project funding, and writing  
374 the manuscript. PCW contributed to data acquisition and writing the manuscript. NS contributed  
375 to method design and writing the manuscript.

376

## 377 **Competing Interests**

378 We declare no competing interests.

379

## 380 **Funding**

1  
2  
3 381 This study was funded by the Canadian Institutes of Health Research. VAC holds the Canada Research  
4  
5 382 Chair in Health Services Geographies and a Scholar Award from the Michael Smith Foundation for  
6  
7 383 Health Research.  
8  
9

10 384

## 13 385 **Data Sharing Statement**

16 386 All crowdfunding data is available from the authors on request.  
17  
18  
19

## 20 387 **References**

- 23 388 1. GoFundMe. About Us. [cited 17 July 2018]. Available from: <https://www.gofundme.com/about-us>.
- 24 389 2. Harris A. GoFundMe keeps gobbling up competitors, says it's "very good for the market". Fast  
25 390 Company. 4 April 2018. Available from: [https://www.fastcompany.com/40554199/gofundme-](https://www.fastcompany.com/40554199/gofundme-keeps-gobbling-up-competitors-says-its-very-good-for-the-market)  
26 391 [keeps-gobbling-up-competitors-says-its-very-good-for-the-market](https://www.fastcompany.com/40554199/gofundme-keeps-gobbling-up-competitors-says-its-very-good-for-the-market).
- 27 392 3. Snyder J, Mathers A, Crooks VA. Fund my treatment!: A call for ethics-focused social science  
28 393 research into the use of crowdfunding for medical care. *Social Science & Medicine*. 2016 Nov  
29 394 1;169:27-30.
- 30 395 4. Young MJ, Scheinberg E. The rise of crowdfunding for medical care: promises and perils. *Jama*.  
31 396 2017 Apr 25;317(16):1623-4.
- 32 397 5. Robinson L, Cotten SR, Ono H, Quan-Haase A, Mesch G, Chen W, Schulz J, Hale TM, Stern MJ.  
33 398 Digital inequalities and why they matter. *Information, communication & society*. 2015 May  
34 399 4;18(5):569-82.
- 35 400 6. Paulus TM, Roberts KR. Crowdfunding a "Real-life Superhero": the construction of worthy bodies  
36 401 in medical campaign narratives. *Discourse, Context & Media*. 2018 Mar 1;21:64-72.
- 37 402 7. Snyder J. Crowdfunding for medical care: ethical issues in an emerging health care funding  
38 403 practice. *Hastings Center Report*. 2016 Nov;46(6):36-42.
- 40 404 8. Berman J., Crowdfunding site won't let crowds fund abortions, *The Huffington Post*. 2014.
- 41 405 9. Charlie Gard's campaign page, Update #4, [GoFundMe.com/please-help-to-save-charlies-life](https://www.gofundme.com/please-help-to-save-charlies-life)
- 43 406 10. Dressler G, Kelly SA. Ethical implications of medical crowdfunding: the case of Charlie Gard.  
44 407 *Journal of medical ethics*. 2018 Jul 1;44(7):453-7.
- 46 408 11. Lukk M, Schneiderhan E, Soares J. Worthy? Crowdfunding the Canadian Health Care and  
47 409 Education Sectors. *Canadian Review of Sociology/Revue canadienne de sociologie*. 2018  
48 410 Aug;55(3):404-24.
- 49 411 12. Berliner LS, Kenworthy NJ. Producing a worthy illness: Personal crowdfunding amidst financial  
50 412 crisis. *Social Science & Medicine*. 2017 Aug 1;187:233-42.
- 52 413 13. Durand WM, Peters JL, Eltorai AE, Kalagara S, Osband AJ, Daniels AH. Medical crowdfunding  
53 414 for organ transplantation. *Clinical transplantation*. 2018 Jun;32(6):e13267.
- 54 415 14. Barcelos CA. 'Bye-bye boobies': normativity, deservingness and medicalisation in transgender  
55 416 medical crowdfunding. *Culture, health & sexuality*. 2019 Feb 9:1-5.



- 1  
2  
3 417 15. Snyder J, Crooks VA, Mathers A, Chow-White P. Appealing to the crowd: ethical justifications in  
4 418 Canadian medical crowdfunding campaigns. *Journal of medical ethics*. 2017 Jan 30:medethics-  
5 419 2016.  
6 420 16. The LO. Mind the gap: charity and crowdfunding in health care. *The Lancet. Oncology*. 2017  
7 421 Mar;18(3):269.  
8 422 17. Snyder J, Chow-White P, Crooks VA, Mathers A. Widening the gap: additional concerns with  
9 423 crowdfunding in health care. *The Lancet Oncology*. 2017 May 1;18(5):e240.  
10 424 18. Bailey TC, Gatrell AC. *Interactive spatial data analysis*. Essex: Longman Scientific & Technical;  
11 425 1995.  
12 426 19. Haining R, Wise S, Ma J. *Exploratory spatial data analysis*. *Journal of the Royal Statistical*  
13 427 *Society: Series D (The Statistician)*. 1998 Sep;47(3):457-69.  
14 428 20. Canadian Institutes of Health Research, Natural Sciences and Engineering Research Council of  
15 429 Canada, and Social Sciences and Humanities Research Council of Canada. Tri-council policy  
16 430 statement: Ethical conduct for research involving humans (TCPS2).  
17 431 21. Statistics Canada. The aggregate dissemination area (ADA): a new census dissemination  
18 432 geographic area. [cited 23 February 2018]. Available from: [http://www12.statcan.gc.ca/census-  
20 434 22. Statistics Canada. Forward Sortation Area – Definition. \[cited 23 February 2018\]. Available from:  
21 435 <http://www.ic.gc.ca/eic/site/bsf-osb.nsf/eng/br03396.html>  
22 436 23. Statistics Canada. Boundary files. \[cited 23 February 2018\]. Available from:  
23 437 <http://www12.statcan.gc.ca/census-recensement/2011/geo/bound-limit/bound-limit-eng.cfm>  
24 438 24. Alter DA, Naylor CD, Austin P, Tu JV. Effects of socioeconomic status on access to invasive  
25 439 cardiac procedures and on mortality after acute myocardial infarction. \*New England Journal of\*  
26 440 \*Medicine\*. 1999 Oct 28;341\(18\):1359-67.  
27 441 25. Goovaerts P. Geostatistical analysis of health data with different levels of spatial aggregation.  
28 442 \*Spatial and spatio-temporal epidemiology\*. 2012 Apr 1;3\(1\):83-92.  
29 443 26. Kapral MK, Wang H, Mamdani M, Tu JV. Effect of socioeconomic status on treatment and  
30 444 mortality after stroke. \*Stroke\*. 2002 Jan 1;33\(1\):268-75.  
31 445 27. Faculty of Arts & Science, University of Toronto. Canadian Census Analyser \[cited 23 February  
32 446 2018\]. Available from: <http://dc1.chass.utoronto.ca/census/index.html>  
33 447 28. Rogers AC. Vulnerability, health and health care. \*Journal of Advanced Nursing\*. 1997  
34 448 Jul;26\(1\):65-72.  
35 449 29. Southern DA, Ghali WA, Faris PD, Norris CM, Galbraith PD, Graham MM, Knudtson ML.  
36 450 Misclassification of income quintiles derived from area-based measures: A comparison of  
37 451 enumeration area and forward sortation area. \*Canadian Journal of Public Health/Revue\*  
38 452 \*Canadienne de Sante'e Publique\*. 2002 Nov 1:465-9.  
39 453 30. Kulig JC, Williams AM, editors. \*Health in rural Canada\*. UBC Press; 2011 Dec 6.  
40 454 31. Haight M, Quan-Haase A, Corbett BA. Revisiting the digital divide in Canada: the impact of  
41 455 demographic factors on access to the internet, level of online activity, and social networking site  
42 456 usage. \*Information, Communication & Society\*. 2014 Apr 21;17\(4\):503-19.  
43 457 32. Friesen L, Purc-Stephenson RJ. Should I Stay or Should I Go? Perceived Barriers to Pursuing a  
44 458 University Education for Persons in Rural Areas. \*Canadian Journal of Higher Education\*.  
45 459 2016;46\(1\):138-55.  
46 460 33. Caxaj CS, Gill NK. Belonging and Mental Wellbeing Among a Rural Indian-Canadian Diaspora:  
47 461 Navigating Tensions in "Finding a Space of Our Own". \*Qualitative health research\*. 2017  
48 462 Jul;27\(8\):1119-32.  
49 463 34. Hankivsky O. Women's health, men's health, and gender and health: Implications of  
50 464 intersectionality. \*Social science & medicine\*. 2012 Jun 1;74\(11\):1712-20.  
51 465 35. Williams DR, Sternthal M. Understanding racial-ethnic disparities in health: sociological  
52 466 contributions. \*Journal of health and social behavior\*. 2010 Mar;51\(1\\_suppl\):S15-27.](http://www12.statcan.gc.ca/census-<br/>19 433 recensement/2016/geo/ADA/adainfo-eng.cfm)



1  
2  
3  
4  
5  
6  
7  
8  
9  
10  
11  
12  
13  
14  
15  
16  
17  
18  
19  
20  
21  
22  
23  
24  
25  
26  
27  
28  
29  
30  
31  
32  
33  
34  
35  
36  
37  
38  
39  
40  
41  
42  
43  
44  
45  
46  
47  
48  
49  
50  
51  
52  
53  
54  
55  
56  
57  
58  
59  
60

- 467 36. Statistics Canada. Forward sortation areas currently being analyzed, 2016 Census. [cited 25  
468 February 2018]. Available from: [http://www12.statcan.gc.ca/census-recensement/2016/ref/FSA-  
470 note-eng.cfm](http://www12.statcan.gc.ca/census-recensement/2016/ref/FSA-<br/>469 note-eng.cfm).  
471 37. Statistics Canada. Population, urban and rural, by province and territory (Canada). [cited 23  
472 February 2018]. Available from: [http://www.statcan.gc.ca/tables-tableaux/sum-  
som/l01/cst01/demo62a-eng.htm](http://www.statcan.gc.ca/tables-tableaux/sum-<br/>som/l01/cst01/demo62a-eng.htm)

For peer review only

473 **Tables**

| <b>Variable</b>                         | <b>Data Obtained</b>                                                                                                                                                                                                                                           |
|-----------------------------------------|----------------------------------------------------------------------------------------------------------------------------------------------------------------------------------------------------------------------------------------------------------------|
| <b>Population and dwelling counts</b>   | Population, 2016                                                                                                                                                                                                                                               |
| <b>Income</b><br>(Total Sex / Total)    | Income statistics in 2015 for the population aged 15 years and over in private households - 100% data / Number of after-tax income recipients aged 15 years and over in private households - 100% data / Median after-tax income in 2015 among recipients (\$) |
| <b>Education</b><br>(Total Sex / Total) | Highest certificate, diploma or degree for the population aged 15 years and over in private households - 25% sample data / Postsecondary certificate, diploma or degree                                                                                        |
| <b>Housing</b><br>(Total Sex / Total)   | Private households by tenure - 25% sample data / Owner                                                                                                                                                                                                         |

474 **Table 1. Variables Obtained from 2016 Census Profiles for Aggregate Dissemination Areas.**

475 Retrieved from the Canadian Census Analyser, University of Toronto

476

| <b>Income Quintile</b> | <b>Number of FSA</b> | <b>Percentage (FSA)</b> | <b>Number of Campaigns</b> | <b>Percentage (Campaigns)</b> |
|------------------------|----------------------|-------------------------|----------------------------|-------------------------------|
| 1 - 5                  | 114                  | 64.77%                  | 247                        | 13.81%                        |
| 6 - 17                 | 36                   | 20.45%                  | 337                        | 18.85%                        |
| 18 - 41                | 16                   | 9.09%                   | 402                        | 22.48%                        |
| 42 - 76                | 6                    | 3.41%                   | 362                        | 20.25%                        |
| 77 - 138               | 4                    | 2.27%                   | 440                        | 24.61%                        |
| <b>Total</b>           | 176                  | 100.00%                 | 1788                       | 100.00%                       |

477 **Table 2. Frequency of Campaigns per FSA. Proportion of Campaigns belonging to each Quintile.**

478

| <b>Income Quintile</b>  | <b>Number of FSA</b> | <b>Percentage (FSA)</b> | <b>Number of Campaigns</b> | <b>Percentage (Campaigns)</b> |
|-------------------------|----------------------|-------------------------|----------------------------|-------------------------------|
| \$0.00 - \$12699.19     | 3                    | 1.70%                   | 104                        | 5.82%                         |
| \$12699.19 - \$28556.91 | 54                   | 30.68%                  | 513                        | 28.69%                        |
| \$28556.91 - \$33333.84 | 63                   | 35.80%                  | 449                        | 25.11%                        |
| \$33333.84 - \$38980.26 | 45                   | 25.57%                  | 593                        | 33.17%                        |
| \$38980.26 - \$51498.11 | 11                   | 6.25%                   | 129                        | 7.21%                         |
| <b>Total</b>            | 176                  | 100.00%                 | 1788                       | 100.00%                       |

479 **Table 3. Income, Median After-Tax (2015). Proportion of Campaigns belonging to each Quintile.**

480

| Income Quintile | Number of FSA | Percentage (FSA) | Number of Campaigns | Percentage (Campaigns) |
|-----------------|---------------|------------------|---------------------|------------------------|
| 1 - 1397        | 12            | 6.82%            | 159                 | 8.89%                  |
| 1397 - 2980     | 41            | 23.30%           | 308                 | 17.23%                 |
| 2980 - 4156     | 72            | 40.91%           | 755                 | 42.23%                 |
| 4156 - 6087     | 46            | 26.14%           | 524                 | 29.31%                 |
| 6087 - 10046    | 5             | 2.84%            | 42                  | 2.35%                  |
| <b>Total</b>    | 176           | 100.00%          | 1788                | 100.00%                |

481 **Table 4. Education, Post-Secondary. Proportion of Campaigns belonging to each Quintile.**

482

| Income Quintile | Number of FSA | Percentage (FSA) | Number of Campaigns | Percentage (Campaigns) |
|-----------------|---------------|------------------|---------------------|------------------------|
| 1 - 1393        | 17            | 9.66%            | 180                 | 10.07%                 |
| 1393 - 2429     | 38            | 21.59%           | 283                 | 15.83%                 |
| 2429 - 3218     | 68            | 38.64%           | 711                 | 39.77%                 |
| 3218 - 4579     | 48            | 27.27%           | 571                 | 31.94%                 |
| 4579 - 7121     | 5             | 2.84%            | 43                  | 2.40%                  |
| <b>Total</b>    | 176           | 100.00%          | 1788                | 100.00%                |

34 **Table 5. Housing, Owner. Proportion of Campaigns belonging to each Quintile.**

483

| Province/<br>Territory     | Number<br>of FSAs | Number of<br>Campaigns | Percentage<br>(FSA) | Percentage<br>(Campaigns) | Population | Income,<br>Median<br>After-Tax<br>(Average) | Education,<br>Post-<br>Secondary<br>(Average) | Housing,<br>Owner<br>(Average) |
|----------------------------|-------------------|------------------------|---------------------|---------------------------|------------|---------------------------------------------|-----------------------------------------------|--------------------------------|
| Alberta                    | 21                | 310                    | 11.93%              | 17.34%                    | 203643     | \$36,012.35                                 | 3393                                          | 2846                           |
| British<br>Columbia        | 32                | 401                    | 18.18%              | 22.43%                    | 268112     | \$28,716.63                                 | 3728                                          | 2599                           |
| Manitoba                   | 9                 | 66                     | 5.11%               | 3.69%                     | 83126      | \$31,275.32                                 | 3211                                          | 3032                           |
| New<br>Brunswick           | 12                | 55                     | 6.82%               | 3.08%                     | 75339      | \$26,745.83                                 | 2287                                          | 2310                           |
| Newfoundland<br>& Labrador | 9                 | 53                     | 5.11%               | 2.96%                     | 69103      | \$26,503.28                                 | 2868                                          | 2809                           |
| Northwest<br>Territories   | 1                 | 3                      | 0.57%               | 0.17%                     | 823        | \$51,498.11                                 | 415                                           | 228                            |
| Nova Scotia                | 9                 | 69                     | 5.11%               | 3.86%                     | 73961      | \$31,392.79                                 | 3908                                          | 2425                           |
| Nunavut                    | 1                 | 1                      | 0.57%               | 0.06%                     | 3          | \$63.72                                     | 0                                             | 0                              |
| Ontario                    | 47                | 576                    | 26.70%              | 32.21%                    | 436637     | \$31,865.32                                 | 3942                                          | 3105                           |
| Prince Edward<br>Island    | 2                 | 25                     | 1.14%               | 1.40%                     | 15301      | \$27,888.67                                 | 2984                                          | 2582                           |
| Quebec                     | 18                | 139                    | 10.23%              | 7.77%                     | 158832     | \$30,057.44                                 | 3923                                          | 2675                           |
| Saskatchewan               | 14                | 85                     | 7.95%               | 4.75%                     | 138065     | \$34,795.72                                 | 3613                                          | 3194                           |
| Yukon                      | 1                 | 5                      | 0.57%               | 0.28%                     | 16962      | \$41,664.80                                 | 3278                                          | 2599                           |
| <b>Total</b>               | 176               | 1788                   | 100.00%             | 100.00%                   | 1539908    | \$30,652.31                                 | 2889                                          | 2339                           |

484 Table 6. Number of Campaigns, Population, and Socio-economic Values per Province.

1  
2  
3 485 **Figure Legends**

486 **Figure 1: High-Level Description of Conversion Procedure Utilized to add Socio-Economic Data at**  
487 **ADA-Level to FSA-Level.** This figure denotes the methodology employed to associate socio-economic  
488 data at the ADA-level with the crowdfunding data collected at the FSA-level.

489 **Figure 2: Sample Interaction Sequence to Support Adding Context to Campaign Markers in the**  
490 **Interactive Web Mapping Tool.** This figure provides a set of sample instructions to users of the CHRP  
491 web map to better understand the datasets displayed.

492 **Figure 3: Screen Capture of Web Map Application (Main Page).** This figure shows the home page of  
493 the CHRP. The data shown in this figure denotes the locations of all crowdfunding campaigns involved  
494 with this study. Basic information associated with each of the campaigns can be viewed here. Permission  
495 has been granted to reproduce this image and it is not under copyright.

496 **Figure 4: Screen Capture of Web Map Application (with the Exploratory layer of Frequency**  
497 **Counts of Campaigns per FSA Displayed).** This figure shows the CHRP displaying one of its  
498 exploratory layers. The variable of interest here is number of crowdfunding campaigns per forward  
499 sortation area. Permission has been granted to reproduce this image and it is not under copyright.

500 **Figure 5: Screen Capture of Web Map Application (with the Exploratory layer of Income (Median,**  
501 **After-Tax, 2015) Displayed).** This figure shows the CHRP displaying one of its exploratory layers. The  
502 variable of interest here is income (median, after-tax, 2015). The income data was obtained from the 2016  
503 Canadian Census at the ADA-level. Permission has been granted to reproduce this image and it is not  
504 under copyright.

505 **Figure 6: Screen Capture of Web Map Application (with Exploratory layer of Education (Number**  
506 **of People with a Post-Secondary Education) Displayed).** This figure shows the CHRP displaying one  
507 of its exploratory layers. The variable of interest here is education (number of individuals that identify as  
508 having post-secondary education). The education data was obtained from the 2016 Canadian Census at  
509 the ADA-level. Permission has been granted to reproduce this image and it is not under copyright.

510 **Figure 7: Screen Capture of Web Map Application (with the Exploratory layer of Housing**  
511 **(Number of People that own homes) Displayed).** This figure shows the CHRP displaying one of its  
512 exploratory layers. The dataset of interest here is housing (number of individuals that own homes). The  
513 housing data was obtained from the 2016 Canadian Census at the ADA-level. Permission has been  
514 granted to reproduce this image and it is not under copyright.

```
1
2
3
4
5
6
7 Algorithm GenerateWeights(ADA dataset, FSA dataset)
8 begin
9   a = Number of FSA, b = Number of ADA
10  Initialize relationship matrix of size a rows by b columns
11  For each i ∈ {FSA1...FSAa):
12    Select all from ADA that intersect with FSAi
13    For each j ∈ {intersecting ADA retrieved in selection}:
14      Calculate percent area that ADAj occupies in FSAi
15      Add weight to matrix at the position corresponding with the respective FSA
16      and ADA IDs.
17    Store relationship matrix as CSV for reuse
18  end
19
20
21
22
23
24
25
26
27
28
29
30
31
32
33
34
35
36
37
38
39
40
41
42
43
44
45
46
47
48
49
50
51
52
53
54
55
56
57
58
59
60
```

165x74mm (220 x 220 DPI)

The User:

1. Views the "CHRP Explorer" web mapping application
2. Clicks and drags the map to populate the campaign list sidebar
3. Clicks on campaign markers or hovers over sidebar listings to learn more about individual Canadian medical crowdfunding campaigns
4. Uses the basic filters slider to filter campaigns to have at least \$10,000 raised, more than 300 friends, and at least 100 donations
5. Clicks the "Exploratory" tab to change the panel contents
6. Selects "Income" under the "Campaign - Socioeconomic Variable Comparison Layers by Forward sortation area" section
7. Zooms into a geographic area of interest and clicks on a coloured area to view the median income average for that FSA the campaign is associated with

164x63mm (220 x 220 DPI)

1  
2  
3  
4  
5  
6  
7  
8  
9  
10  
11  
12  
13  
14  
15  
16  
17  
18  
19  
20  
21  
22  
23  
24  
25  
26  
27  
28  
29  
30  
31  
32  
33  
34  
35  
36  
37  
38  
39  
40  
41  
42  
43  
44  
45  
46  
47  
48  
49  
50  
51  
52  
53  
54  
55  
56  
57  
58  
59  
60

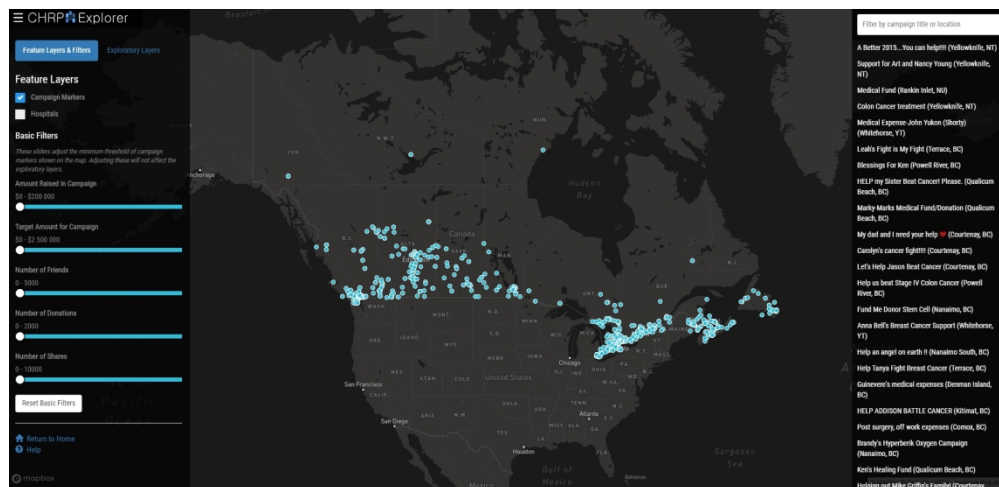

Figure 3

169x81mm (288 x 288 DPI)



1  
2  
3  
4  
5  
6  
7  
8  
9  
10  
11  
12  
13  
14  
15  
16  
17  
18  
19  
20  
21  
22  
23  
24  
25  
26  
27  
28  
29  
30  
31  
32  
33  
34  
35  
36  
37  
38  
39  
40  
41  
42  
43  
44  
45  
46  
47  
48  
49  
50  
51  
52  
53  
54  
55  
56  
57  
58  
59  
60

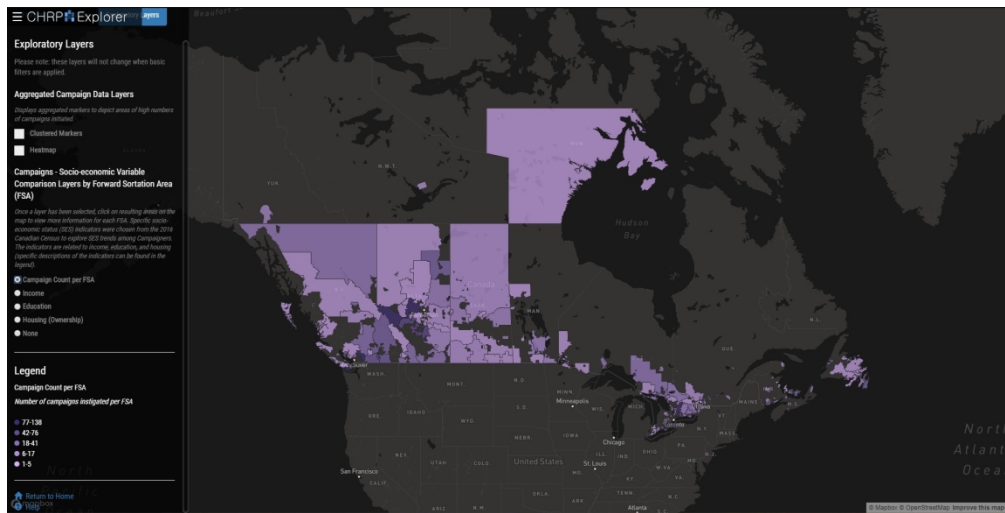

Figure 4

169x85mm (288 x 288 DPI)

1  
2  
3  
4  
5  
6  
7  
8  
9  
10  
11  
12  
13  
14  
15  
16  
17  
18  
19  
20  
21  
22  
23  
24  
25  
26  
27  
28  
29  
30  
31  
32  
33  
34  
35  
36  
37  
38  
39  
40  
41  
42  
43  
44  
45  
46  
47  
48  
49  
50  
51  
52  
53  
54  
55  
56  
57  
58  
59  
60

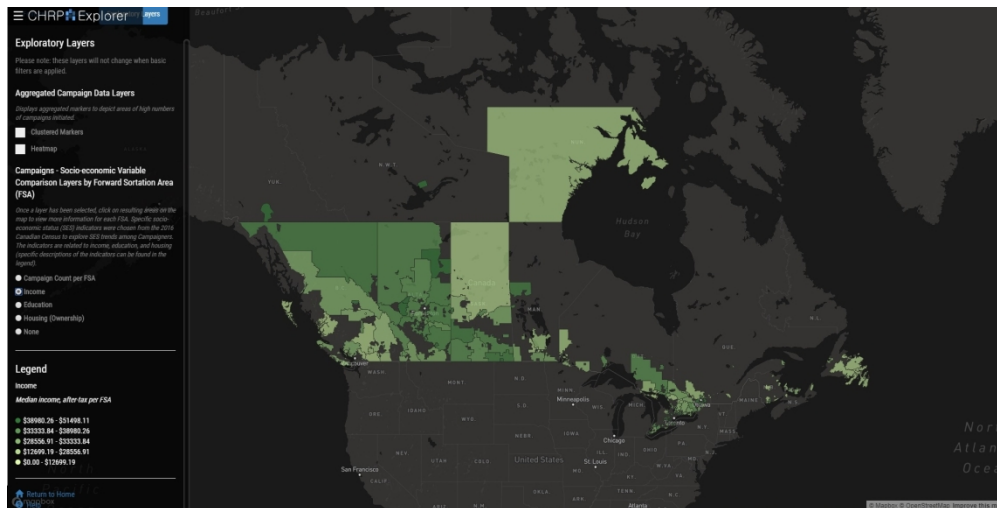

Figure 5

169x85mm (288 x 288 DPI)

1  
2  
3  
4  
5  
6  
7  
8  
9  
10  
11  
12  
13  
14  
15  
16  
17  
18  
19  
20  
21  
22  
23  
24  
25  
26  
27  
28  
29  
30  
31  
32  
33  
34  
35  
36  
37  
38  
39  
40  
41  
42  
43  
44  
45  
46  
47  
48  
49  
50  
51  
52  
53  
54  
55  
56  
57  
58  
59  
60

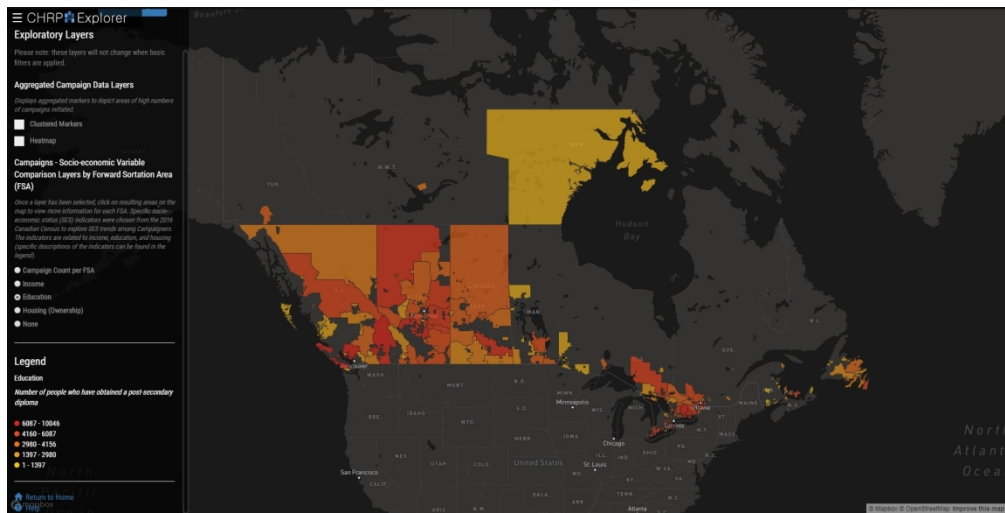

Figure 6

169x85mm (288 x 288 DPI)

1  
2  
3  
4  
5  
6  
7  
8  
9  
10  
11  
12  
13  
14  
15  
16  
17  
18  
19  
20  
21  
22  
23  
24  
25  
26  
27  
28  
29  
30  
31  
32  
33  
34  
35  
36  
37  
38  
39  
40  
41  
42  
43  
44  
45  
46  
47  
48  
49  
50  
51  
52  
53  
54  
55  
56  
57  
58  
59  
60

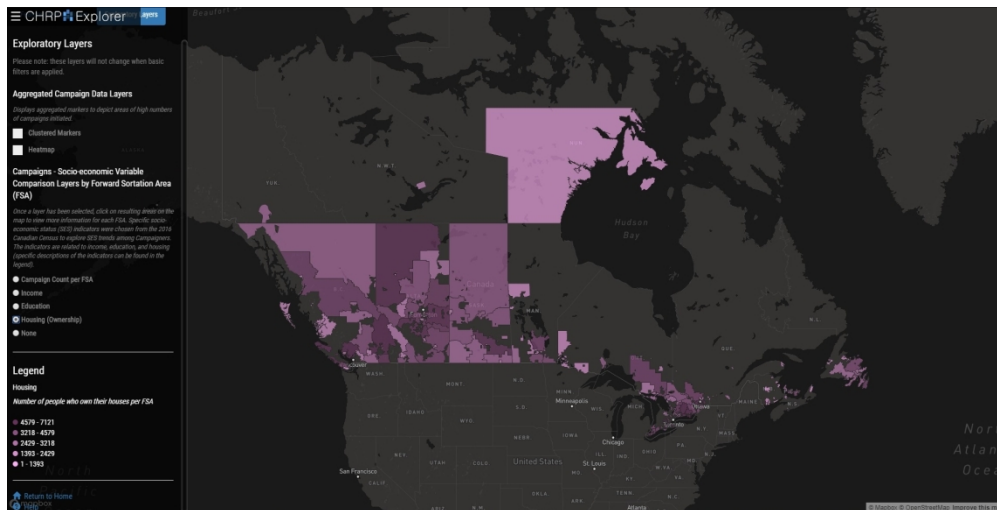

Figure 7

168x85mm (288 x 288 DPI)

## Standards for Reporting Qualitative Research (SRQR)\*

<http://www.equator-network.org/reporting-guidelines/srqr/>

Page/line no(s).

### Title and abstract

|                                                                                                                                                                                                                                                              |      |
|--------------------------------------------------------------------------------------------------------------------------------------------------------------------------------------------------------------------------------------------------------------|------|
| <p><b>Title</b> - Concise description of the nature and topic of the study Identifying the study as qualitative or indicating the approach (e.g., ethnography, grounded theory) or data collection methods (e.g., interview, focus group) is recommended</p> | p. 1 |
| <p><b>Abstract</b> - Summary of key elements of the study using the abstract format of the intended publication; typically includes background, purpose, methods, results, and conclusions</p>                                                               | p. 2 |

### Introduction

|                                                                                                                                                                     |      |
|---------------------------------------------------------------------------------------------------------------------------------------------------------------------|------|
| <p><b>Problem formulation</b> - Description and significance of the problem/phenomenon studied; review of relevant theory and empirical work; problem statement</p> | p. 4 |
| <p><b>Purpose or research question</b> - Purpose of the study and specific objectives or questions</p>                                                              | p. 4 |

### Methods

|                                                                                                                                                                                                                                                                                                                                                                                                             |         |
|-------------------------------------------------------------------------------------------------------------------------------------------------------------------------------------------------------------------------------------------------------------------------------------------------------------------------------------------------------------------------------------------------------------|---------|
| <p><b>Qualitative approach and research paradigm</b> - Qualitative approach (e.g., ethnography, grounded theory, case study, phenomenology, narrative research) and guiding theory if appropriate; identifying the research paradigm (e.g., postpositivist, constructivist/ interpretivist) is also recommended; rationale**</p>                                                                            | pp. 5-7 |
| <p><b>Researcher characteristics and reflexivity</b> - Researchers' characteristics that may influence the research, including personal attributes, qualifications/experience, relationship with participants, assumptions, and/or presuppositions; potential or actual interaction between researchers' characteristics and the research questions, approach, methods, results, and/or transferability</p> | N/A     |
| <p><b>Context</b> - Setting/site and salient contextual factors; rationale**</p>                                                                                                                                                                                                                                                                                                                            | pp. 5-7 |
| <p><b>Sampling strategy</b> - How and why research participants, documents, or events were selected; criteria for deciding when no further sampling was necessary (e.g., sampling saturation); rationale**</p>                                                                                                                                                                                              | pp. 5-7 |
| <p><b>Ethical issues pertaining to human subjects</b> - Documentation of approval by an appropriate ethics review board and participant consent, or explanation for lack thereof; other confidentiality and data security issues</p>                                                                                                                                                                        | N/A     |
| <p><b>Data collection methods</b> - Types of data collected; details of data collection procedures including (as appropriate) start and stop dates of data collection and analysis, iterative process, triangulation of sources/methods, and modification of procedures in response to evolving study findings; rationale**</p>                                                                             | pp. 5-7 |

|                       |                                                                                                                                                                                                                                                       |         |
|-----------------------|-------------------------------------------------------------------------------------------------------------------------------------------------------------------------------------------------------------------------------------------------------|---------|
| 1<br>2<br>3<br>4<br>5 | <b>Data collection instruments and technologies</b> - Description of instruments (e.g., interview guides, questionnaires) and devices (e.g., audio recorders) used for data collection; if/how the instrument(s) changed over the course of the study | pp. 5-7 |
| 6<br>7<br>8           | <b>Units of study</b> - Number and relevant characteristics of participants, documents, or events included in the study; level of participation (could be reported in results)                                                                        | pp. 5-7 |
| 9<br>10<br>11<br>12   | <b>Data processing</b> - Methods for processing data prior to and during analysis, including transcription, data entry, data management and security, verification of data integrity, data coding, and anonymization/de-identification of excerpts    | Pp. 5-7 |
| 13<br>14<br>15<br>16  | <b>Data analysis</b> - Process by which inferences, themes, etc., were identified and developed, including the researchers involved in data analysis; usually references a specific paradigm or approach; rationale**                                 | Pp. 5-7 |
| 17<br>18<br>19<br>20  | <b>Techniques to enhance trustworthiness</b> - Techniques to enhance trustworthiness and credibility of data analysis (e.g., member checking, audit trail, triangulation); rationale**                                                                | Pp. 5-7 |

## Results/findings

|                      |                                                                                                                                                                                                   |         |
|----------------------|---------------------------------------------------------------------------------------------------------------------------------------------------------------------------------------------------|---------|
| 23<br>24<br>25<br>26 | <b>Synthesis and interpretation</b> - Main findings (e.g., interpretations, inferences, and themes); might include development of a theory or model, or integration with prior research or theory | pp. 7-9 |
| 27<br>28<br>29       | <b>Links to empirical data</b> - Evidence (e.g., quotes, field notes, text excerpts, photographs) to substantiate analytic findings                                                               | pp. 7-9 |

## Discussion

|                                  |                                                                                                                                                                                                                                                                                                                                                                                                             |           |
|----------------------------------|-------------------------------------------------------------------------------------------------------------------------------------------------------------------------------------------------------------------------------------------------------------------------------------------------------------------------------------------------------------------------------------------------------------|-----------|
| 32<br>33<br>34<br>35<br>36<br>37 | <b>Integration with prior work, implications, transferability, and contribution(s) to the field</b> - Short summary of main findings; explanation of how findings and conclusions connect to, support, elaborate on, or challenge conclusions of earlier scholarship; discussion of scope of application/generalizability; identification of unique contribution(s) to scholarship in a discipline or field | pp. 9-10  |
| 38<br>39                         | <b>Limitations</b> - Trustworthiness and limitations of findings                                                                                                                                                                                                                                                                                                                                            | pp. 10-11 |

## Other

|                |                                                                                                                                               |       |
|----------------|-----------------------------------------------------------------------------------------------------------------------------------------------|-------|
| 42<br>43<br>44 | <b>Conflicts of interest</b> - Potential sources of influence or perceived influence on study conduct and conclusions; how these were managed | p. 12 |
| 45<br>46       | <b>Funding</b> - Sources of funding and other support; role of funders in data collection, interpretation, and reporting                      | p. 13 |

\*The authors created the SRQR by searching the literature to identify guidelines, reporting standards, and critical appraisal criteria for qualitative research; reviewing the reference lists of retrieved sources; and contacting experts to gain feedback. The SRQR aims to improve the transparency of all aspects of qualitative research by providing clear standards for reporting qualitative research.

1  
2  
3  
4  
5  
6  
7  
8  
9  
10  
11  
12  
13  
14  
15  
16  
17  
18  
19  
20  
21  
22  
23  
24  
25  
26  
27  
28  
29  
30  
31  
32  
33  
34  
35  
36  
37  
38  
39  
40  
41  
42  
43  
44  
45  
46  
47  
48  
49  
50  
51  
52  
53  
54  
55  
56  
57  
58  
59  
60

\*\*The rationale should briefly discuss the justification for choosing that theory, approach, method, or technique rather than other options available, the assumptions and limitations implicit in those choices, and how those choices influence study conclusions and transferability. As appropriate, the rationale for several items might be discussed together.

**Reference:**

O'Brien BC, Harris IB, Beckman TJ, Reed DA, Cook DA. **Standards for reporting qualitative research: a synthesis of recommendations.** *Academic Medicine*, Vol. 89, No. 9 / Sept 2014  
DOI: 10.1097/ACM.0000000000000388

For peer review only
